1 **An emergent Ebola virus nucleoprotein variant influences virion**  
2 **budding, oligomerization, transcription and replication**

3 Aaron E Lin<sup>1,2,3,11</sup>, William E Diehl<sup>4,11</sup>, Yingyun Cai<sup>5</sup>, Courtney Finch<sup>5</sup>, Chidiebere Akusobi<sup>6</sup>,  
4 Robert N Kirchdoerfer<sup>7</sup>, Laura Bollinger<sup>5</sup>, Stephen F Schaffner<sup>2,3</sup>, Elizabeth A Brown<sup>2,3</sup>, Erica  
5 Ollmann Saphire<sup>7,8</sup>, Kristian G Andersen<sup>7,9</sup>, Jens H Kuhn<sup>5,12</sup>, Jeremy Luban<sup>4,12</sup>, Pardis C  
6 Sabeti<sup>1,2,3,10,12</sup>

7

8 <sup>1</sup>Harvard Program in Virology, Harvard Medical School, Boston, MA 02115, USA. <sup>2</sup>FAS Center  
9 for Systems Biology, Department of Organismic and Evolutionary Biology, Harvard University,  
10 Cambridge, MA 02138, USA. <sup>3</sup>Broad Institute of Harvard and MIT, Cambridge, MA 02142, USA.  
11 <sup>4</sup>Program in Molecular Medicine, University of Massachusetts Medical School, Worcester, MA  
12 01605, USA. <sup>5</sup>Integrated Research Facility at Fort Detrick, National Institute of Allergy and  
13 Infectious Diseases, National Institutes of Health, Frederick, MD 21702. <sup>6</sup>Department of  
14 Immunology and Infectious Diseases, Harvard T.H. Chan School of Public Health, Boston, MA  
15 02120, USA. <sup>7</sup>Department of Immunology and Microbial Sciences, The Scripps Research  
16 Institute, La Jolla, CA 92037, USA. <sup>8</sup>The Skaggs Institute for Chemical Biology, The Scripps  
17 Research Institute, La Jolla, CA 92037, USA. <sup>9</sup>Scripps Translational Science Institute, La Jolla,  
18 CA 92037, USA. <sup>10</sup>Howard Hughes Medical Institute, Chevy Chase, MD 20815, USA. <sup>11</sup>Co-first  
19 author. <sup>12</sup>Co-last author.

## 1 **Abstract**

2

3 To investigate how Ebola virus phenotypes changed during the 2013–2016 Western African  
4 Ebola virus disease epidemic, we examined a key viral mutation that rose to high frequency: an  
5 R111C substitution in the viral nucleoprotein (NP). Though NP plays many essential roles  
6 during infection, there are a limited number of assays for studying these functions. We  
7 developed new reporter assays to measure virion-like particle (VLP) production and NP  
8 oligomerization in live cells under biosafety level 2 conditions. We found that NP-R111C  
9 significantly enhanced VLP production and slightly increased NP oligomerization without  
10 impairing viral transcription and replication. By contrast, a synthetic charge-reversal mutant, NP-  
11 R111E, greatly increased oligomerization but dramatically reduced transcription and replication.  
12 We detected an interaction of NP with the cellular clathrin adaptor protein-1 (AP-1) complex,  
13 which may explain how NP facilitates VLP production. Our study provides enhanced methods to  
14 study NP and indicates a complex interplay between NP's roles in virion budding, protein  
15 structure, and transcription and replication.

## 1 **Introduction**

2 Given the past and current public health threats caused by Ebola virus disease (EVD)  
3 outbreaks, rapidly evaluating whether Ebola virus (EBOV) genomic mutations change viral  
4 phenotypes is critically important. As an RNA virus, EBOV generates many mutations over the  
5 course of an outbreak. The vast majority of these mutations likely will not be adaptive and will  
6 instead have negligible or negative effects on EBOV viability and replication (Holmes 2009).  
7 Yet, changes in the EBOV genome over time can have important implications for clinical patient  
8 care, epidemiological modeling, and vaccine development, and thus influence prospective  
9 outbreak prediction and outbreak response.

10         The need to better understand EBOV evolution became clear during the 2013–2016  
11 EVD epidemic in Western Africa caused by the EBOV Makona variant. This epidemic is the  
12 largest EVD epidemic on record with over 28,000 infections and more than 11,000 deaths  
13 (WHO 2016). EBOV replication generated thousands of mutations over numerous rounds of  
14 human-to-human transmission (Baize et al. 2014; Gire et al. 2014; Carroll et al. 2015; Ladner et  
15 al. 2015; Tong et al. 2015; Park et al. 2015; Simon-Loriere et al. 2015; Kugelman et al. 2015; T.  
16 Hoenen et al. 2015; Thomas Hoenen et al. 2016; Smits et al. 2015; Quick et al. 2016), but only  
17 a handful of mutations became common enough to have had a sizeable impact on the epidemic  
18 (Baize et al. 2014; Gire et al. 2014; Park et al. 2015; Carroll et al. 2015; Ladner et al. 2015;  
19 Tong et al. 2015; Simon-Loriere et al. 2015). These mutations define four distinct genetic EBOV  
20 Makona clades, which emerged as the outbreak was accelerating in May 2014. Each of the  
21 clades, termed “SL1” through “SL4,” descended from one another sequentially (e.g., SL2  
22 derived from SL1), with a subsequent increase in EVD cases. Because non-synonymous  
23 mutations directly change protein sequence, we focused on the only two non-synonymous  
24 clade-defining mutations—one each defining the SL1 and SL2 clades.

25

1 The SL1 clade-defining mutation, C6283U, results in an A82V substitution in the EBOV  
2 glycoprotein (GP-A82V) and has been studied extensively through well-established biosafety  
3 level 2 (BSL-2) surrogate model systems and live virus BSL-4 studies. Because EBOV GP  
4 mediates EBOV particle entry into cells and is a major target for host antibodies, GP-A82V is an  
5 obvious priority for experimental studies. During outbreaks of other viral diseases, mutation in  
6 viral surface proteins such as GP has altered cell tropism (e.g., Zika virus (Yuan et al. 2017)) or  
7 host tropism (e.g., chikungunya virus (Tsetsarkin et al. 2007)). Based on multiple *in vitro*  
8 studies, GP-A82V increases EBOV infectivity for a variety of human and non-human primate  
9 cell types. These data suggest that the mutation confers a selective advantage to EBOV (Diehl  
10 et al. 2016; Urbanowicz et al. 2016; Dietzel et al. 2017; Ueda et al. 2017; Hoffmann et al. 2017;  
11 Wang et al. 2017), which however has not yet been demonstrated clearly *in vivo* (Marzi et al.  
12 2018; Wong et al. 2018).

13 The SL2 clade-defining mutation, C800U, results in an R111C substitution in the EBOV  
14 nucleoprotein (NP-R111C) and has not been thoroughly studied because, though NP has many  
15 functions, there are a limited number of assays for studying these functions. While surface  
16 glycoproteins like EBOV GP alter viral tropism primarily by affecting cell susceptibility (e.g.,  
17 increased viral entry), mutations in non-glycoproteins can also affect viral tropism by changing  
18 cell permissiveness (e.g., increased viral genome replication) (Cauldwell et al. 2014; Kirmaier et  
19 al. 2010; Krupp et al. 2013; Zimmermann et al. 2011). For this study, we focused our attention  
20 on EBOV NP.

21 The N-terminus of EBOV NP, which contains the R111 residue, interacts with viral RNA  
22 and connects multiple viral phenotypes such as virion structure, and transcription and  
23 replication. During virion assembly and budding, the EBOV matrix protein VP40 dimerizes in the  
24 cytoplasm, traffics to the cell membrane, and oligomerizes. VP40 oligomers engage with the  
25 EBOV ribonucleoprotein (RNP) complex composed of NP, polymerase cofactor VP35,  
26 transcription regulator VP30, and RNA-dependent polymerase L, and shape the cell's plasma

1 membrane around them into EBOV virions, which exit the cell by budding (Luke D. Jasenosky  
2 and Kawaoka 2004). Expression of VP40 in the absence of other viral proteins generates  
3 similarly shaped particles, dubbed virion-like particles (VLPs) (Harty et al. 2000; L. D. Jasenosky  
4 et al. 2001; Noda et al. 2002). Co-expression of VP40 with NP or other viral proteins  
5 significantly increases the number of VLPs in cellular supernatant (Licata et al. 2004),  
6 suggesting that NP plays a structural role in assembling and stabilizing VLPs. Mutations in NP  
7 that affect its ability to enhance VLP production are not known.

8 EBOV NP also plays an essential role in viral transcription and replication. By directly  
9 interacting with EBOV RNA, VP35, and VP30, NP recruits L to enact both of these essential  
10 functions (Groseth et al. 2009). Based on EBOV NP structural data, homology modeling versus  
11 other viral nucleoproteins, and site-directed mutagenesis experiments, key EBOV NP residues  
12 that interact with EBOV RNA (Dong et al. 2015; Leung et al. 2015; Kirchdoerfer et al. 2015),  
13 VP35 (Leung et al. 2015; Kirchdoerfer et al. 2015), and VP30 (Kirchdoerfer et al. 2016) have  
14 been identified. However, NP residue 111, the site of the Makona variant SL2 clade-defining  
15 mutation, lies outside of any of these annotated interaction surfaces.

16 Yet another property of EBOV NP is its ability to form long oligomers; these oligomers  
17 coat EBOV RNA during multiple viral life cycle events. Many studies have determined the  
18 structure of the core of NP and modeled how it interacts with itself and RNA (Dong et al. 2015;  
19 Leung et al. 2015; Kirchdoerfer et al. 2015; Wan et al. 2017; Su et al. 2018; Sugita et al. 2018).  
20 However, the oligomerization domain (OD) at the very N-terminus of NP has eluded  
21 crystallization, presumably due to its disordered structure (Su et al. 2018). Alterations to NP  
22 oligomerization could affect virion assembly and transcription and replication, but the interplay of  
23 these functions is not obvious. Aside from deletion of the oligomerization domain ( $\Delta$ OD), no  
24 other mutations are known to affect EBOV NP oligomerization, in part because oligomerization  
25 is a challenging phenotype to assay in cell culture.

1           For this study, we have adapted and, when necessary, created new BSL-2 methods to  
2 study key functions of EBOV NP in cell culture. Such tools are critical for rapidly characterizing  
3 unknown or emerging mutants since studying live EBOV requires scarce maximum containment  
4 (BSL-4) facilities. Moreover, existing recombinant live virus systems typically use the same  
5 genetic backbone that is different from the Makona C-15 EBOV (Volchkov et al. 2001; Neumann  
6 et al. 2002; Towner et al. 2005; Thomas Hoenen et al. 2013), and generating new recombinant  
7 systems remains logistically and financially challenging due to restrictions on their use and  
8 associated synthesis costs. Using these straightforward, modular reporter assays, we found that  
9 NP-R111C increases EBOV VLP production. In addition, NP residue 111 is positioned to control  
10 NP oligomerization and viral transcription and replication, highlighting the multi-functionality of  
11 NP. Our findings support the possibility that NP-R111C is beneficial for viral replication.

## 1 **Results**

2

### 3 **Ebola virus nucleoprotein mutation R111C emerged alongside a GP-A82V** 4 **mutation during the 2013–2016 Western African epidemic**

5 Among the viral mutations that rose to dominate the EBOV population during the 2013–2016  
6 Western African EVD epidemic, NP-R111C is of great interest because it shares features with  
7 the GP-A82V mutation that enhances viral infectivity *in vitro* (Diehl et al. 2016; Urbanowicz et al.  
8 2016; Dietzel et al. 2017; Ueda et al. 2017; Hoffmann et al. 2017; Wang et al. 2017). GP-A82V  
9 and NP-R111C are two major clade-defining mutations that rose to high frequency during the  
10 epidemic; other mutations do not affect the amino acid sequence of EBOV proteins (Gire et al.  
11 2014; Park et al. 2015). Based on phylogeny of EBOV genomes from clinical samples, the NP-  
12 R111C mutation occurred soon after the emergence of the GP-A82V substitution (Figure 1A)  
13 and temporally preceded the inflection point of the epidemic (Figure 1B). Indeed, few EBOV  
14 Makona variant genomes encode the GP-A82V mutation in the absence of the NP-R111C  
15 mutation (23 cases, 1.26% of total), and the overwhelming majority of genomes encode both  
16 mutations (1653 cases, 90.67% of total).

17

### 18 **Location of the Ebola virus nucleoprotein R111 residue**

19 To investigate the functional importance of the NP 111 residue, we examined existing  
20 annotations and potential functions of NP. The R111 residue lies outside of key sites known to  
21 be interaction surfaces (i.e., for binding EBOV RNA and VP35) (Figure 1C). Based on NP  
22 crystal structures (Kirchdoerfer et al. 2015; Dong et al. 2015), the R111 residue appears on the  
23 same face of the protein as the NP oligomerization domain (Figure 1D, left, Figure S1A),  
24 opposite to the key VP35 and RNA interaction residues (Figure 1D, right). Electron microscopy  
25 (EM) subtomogram averaging indicates that R111 is proximally located to key oligomerization

1 residues (Figure S1A, blue) (Wan et al. 2017). Interestingly, R111 lies amidst a conserved  
2 stretch of 3 basic residues, K109/K110/R111, on the surface of the NP protein. A recent cryo-  
3 EM structure identifies K110, adjacent to R111, as a residue forming a key electrostatic  
4 interstrand NP-NP interaction (Sugita et al. 2018). Therefore, we focused on whether NP-  
5 R111C affects structural phenotypes during the EBOV life cycle, and further queried this residue  
6 by generating charge-reversed mutants (NP-R111E and NP-K109E/K110E/R111E).

7

## 8 **Ebola virus nucleoprotein mutation R111C increases budding of virion-like** 9 **particles**

10 To determine whether the NP-R111C mutation plays a structural role in infectivity, we designed  
11 and performed a VLP budding assay. Traditionally, researchers assess viral budding efficiency  
12 by harvesting cell culture supernatants, purifying VLPs by ultracentrifugation through sucrose,  
13 and detecting VLPs by western blot (WB) using antibodies to specific VLP components (Licata  
14 et al. 2004; McCarthy, Licata, and Harty 2006; Bornholdt et al. 2013; Liu et al. 2010). However,  
15 WBs are often not sensitive to modest changes in VLP numbers and can suffer from high  
16 technical variability. By contrast, luminescence can be reproducibly detected over a larger linear  
17 dynamic range, so one would prefer to generate luciferase-fused VLPs for cell-based  
18 expression, purification, and luminescence detection instead of WBs. However, the size of firefly  
19 luciferase (FLuc; 60 kDa) can severely interfere with incorporation into budding VLPs. Indeed,  
20 although the EBOV matrix protein VP40 (40 kDa) alone is sufficient to bud VLPs (Harty et al.  
21 2000; L. D. Jasenosky et al. 2001; Noda et al. 2002), fusion of VP40 to FLuc decreased  
22 luciferase activity to undetectable levels in a budding assay (McCarthy, Licata, and Harty 2006).  
23 Here, we took advantage of the smaller size of NanoLuc (NLuc; 19 kDa) (Hall et al. 2012) and  
24 fused it to VP40. We expressed NLuc-VP40 in cell culture, purified VLPs following established  
25 protocols, and measured NLuc reporter activity (Figure 2A).



1           To verify that our assay was truly measuring VLP production, we generated loss-of-  
2 function (LOF) mutants, measured thermal stability, and visualized VLPs via electron  
3 microscopy (EM). We generated VP40-L117R, an LOF mutant that was defective in  
4 dimerization, membrane trafficking, and VLP budding as judged by immunofluorescence  
5 microscopy and WB (Bornholdt et al. 2013). As expected, budding of this mutant was >400-fold  
6 impaired compared to wild-type VP40-L117 in our NLuc-based VLP assay (adj.  $p < 0.002$ ;  
7 Dunnett's test) (Figure 2B). Additionally, since monomeric VP40 can be expelled from cells in  
8 exosomes (Pleat et al. 2016), we tested whether ultracentrifugation was purifying VP40-VLPs  
9 specifically. As NLuc (Hall et al. 2012) has a higher melting point than VP40 VLPs (Hu et al.  
10 2011), we heated the total supernatant to denature VLPs. Compared to heating supernatant to  
11 60.2 °C alone, heating and subsequent ultracentrifugation reduced NLuc activity 15-fold ( $p <$   
12 0.007; paired t-test). This reduction in NLuc activity suggests that NLuc-VP40-bearing VLPs  
13 were denatured and thus were not pelleted and detected (Figure S2A). Lastly, using EM, we  
14 observed VLPs in culture supernatant of cells expressing VP40 and NP-R111 or NP-R111C  
15 (Figure S2B), which appeared similar in size and volume (Figure S2C).

16           Next, we tested the NP-R111 mutants in our VLP budding assay and found that only NP-  
17 R111C improved VLP production. Expression of viral nucleoproteins, including EBOV, is known  
18 to significantly increase matrix protein-induced VLP production (Licata et al. 2004). We verified  
19 that ancestral NP-R111 expression increased NLuc-VP40 VLP production 1.93-fold compared  
20 to enhanced green fluorescent protein (eGFP) control inserted in place of NP-R111 (adj.  $p <$   
21 0.0002, Dunnett's test) (Figure 2C). NP-R111C significantly increased VLP production above  
22 NP-R111 (1.26-fold; adj.  $p < 0.039$ , Dunnett's test), whereas the charge-reversed NP-R111E  
23 (1.07-fold; adj.  $p < 0.847$ , Dunnett's test) and NP-K109E/K110E/R111E (1.13-fold; adj.  $p <$   
24 0.484, Dunnett's test) did not have a reproducible effects.

25

## 1 **Ebola virus nucleoprotein position 111 significantly affects oligomerization of NP**

2 To illuminate why NP-R111C increases VLP production, we developed an assay to measure  
3 intracellular NP oligomerization using bioluminescence resonance energy transfer (BRET).  
4 Traditional oligomerization assays in cell culture involve tagging a protein separately with two  
5 different tags, co-expressing both, and then co-immunoprecipitation (co-IP) targeting one tag  
6 and WB targeting the other tag (Watanabe, Noda, and Kawaoka 2006; Ng et al. 2012; Ortiz-  
7 Riano et al. 2012). However, WB often has linear dynamic range issues; furthermore, co-IPs  
8 can introduce non-specific or spurious protein-protein interactions under different cell lysis and  
9 binding buffers. To overcome these deficits of co-IPs and WBs, we used BRET to study NP  
10 oligomerization in live cells. We tagged NP with either NLuc or HaloTag (which covalently binds  
11 to an acceptor fluorophore), co-expressed the tagged NPs in cells, and activated the NP-NLuc  
12 with substrate, resulting in emission of light at 465 nm. Spatial proximity of NP-NLuc to NP-  
13 HaloTag due to NP oligomerization results in energy transfer and a second light emission at a  
14 longer wavelength, 625 nm (Figure 3A) (Machleidt et al. 2015).

15 To verify that our assay was truly measuring NP oligomerization, we generated NP LOF  
16 mutants and disrupted oligomerization with biologically relevant EBOV VP35. We first generated  
17 NP- $\Delta$ OD, an LOF mutant that size exclusion chromatography and multiangle light scattering  
18 indicate to be defective in oligomerization (Kirchdoerfer et al. 2015). Then, we confirmed that  
19 the mutant lost oligomerization capability using the traditional dual-tag co-IP-WB strategy  
20 (Figure S3). We then performed our BRET assay in live cells and, as expected, the lack of NP-  
21 NLuc or NP-HaloTag, expression of NP- $\Delta$ OD, or free NLuc reduced BRET signal appreciably  
22 (Figure 3B). To confirm our assay in a biologically relevant context, we additionally expressed  
23 the NP-binding peptide (NPBP) of EBOV VP35, which disrupts NP oligomerization (Kirchdoerfer  
24 et al. 2015). To quantitatively detect VP35 NPBP expression, we fused eGFP to NPBP via a  
25 bridging porcine teschovirus 1 2A 'self-cleaving' peptide (Kim et al. 2011) (eGFP-P2A-

1 VP35(NPBP)). Titrating increasing amounts of VP35 NPBP led to a quantitative decrease in  
2 BRET oligomerization signal (residual  $\div$  total sum of squares = 0.95) (Figure 3C).

3         Next, we measured the propensity of NP-R111 variants to form oligomers and found that  
4 NP-R111C, and to an even greater extent NP-R111E and NP-K109E/K110E/R111E, increased  
5 NP oligomerization. To quantify changes in oligomerization, we titrated an increasing  
6 concentration of acceptor NP-HaloTag to saturate the donor NP-NLuc signal. The resulting  
7 binding curves fit well to Michaelis-Menten kinetics, described by the parameters  $v_{max}$  (maximum  
8 signal) and  $K_m$  (concentration of NP-HaloTag needed to reach half  $v_{max}$ ) (Figure 3D). As  
9 expected, control eGFP substituted for NP resulted in no detectable BRET signal, and NP- $\Delta$ OD-  
10 HaloTag resulted in background signal detected only at high concentrations (Figure 3D).  
11 Relative to NP-R111, NP-R111C increased oligomerization slightly (12% lower  $K_m$ ; adj.  $p <$   
12 0.003, Dunnett's test), whereas the charge-reversed NP-R111E (36% lower  $K_m$ ; adj.  $p <$  0.0001,  
13 Dunnett's test) and NP-K109E/K110E/R111E (28% lower  $K_m$ ; adj.  $p <$  0.0001, Dunnett's test)  
14 mutants oligomerized at even lower concentrations (Figure 3D). These results support our  
15 hypothesis that the NP 111 residue affects NP-NP interactions (Figure 1D, S1A). Indeed,  
16 deuterium exchange mass spectrometry indicates that this residue is partially buried in wild-type  
17 NP compared to an oligomerization-incompetent NP (Su et al. 2018). Moreover, cryo-EM  
18 identifies the adjacent residue, NP-K110, as forming a key electrostatic interaction with NP-  
19 E349 on a neighboring NP molecule (Sugita et al. 2018).

20

## 21 **Ebola virus nucleoprotein interacts with the AP-1 clathrin adaptor complex** 22 **independent of the nucleoprotein residue 111 allele**

23 As NP-NP interactions appeared to be affected by the NP 111 residue, we searched for host  
24 binding proteins that may explain how NP enhances VLP budding. Only a single interactome  
25 study has been performed on EBOV NP fused to eGFP (García-Dorival et al. 2016), which

1 utilized the NP amino acid sequence from the Mayinga isolate of the EBOV Yambuku variant,  
2 the first EBOV isolated in 1976.

3 To build upon these previous results, we performed immunoprecipitation tandem mass  
4 spectrometry (IP-MS/MS) using myc-tagged NP from EBOV/Makona bearing either R111 or NP-  
5 K109E/K110E/R111E. Our approach yielded multiple members of the adaptor related protein  
6 1 (AP-1) complex as strong candidate interactors (Figure 4A, right), which were identified  
7 previously (García-Dorival et al. 2016) but were not further confirmed in that study. Here, we  
8 confirm that both NP-R111 and NP-K109E/K110E/R111E strongly interact with AP-1 subunit M1  
9 (AP1M1) and AP1G1 by reciprocal IP-WB (Figure 4B). Yet, NP-R111C, NP-R111E, and NP-  
10 K109E/K110E/R111E all bind to the AP-1 complex with similar affinity as NP-R111 (**Figure 4C**),  
11 suggesting that the AP-1 interaction does not explain why the epidemic mutation NP-R111C  
12 produced more VLPs than the ancestral NP-R111.

13

## 14 **Ebola virus nucleoprotein position 111 influences viral transcription and** 15 **replication**

16 The mechanism by which changes in NP's structural phenotypes (budding,  
17 oligomerization) affect viral transcription and replication is not obvious because NP is highly  
18 multi-functional. We quantified viral transcription and replication using a minigenome reporter  
19 assay (Luke D. Jasenosky, Neumann, and Kawaoka 2010). In this assay, we express the  
20 components of the EBOV RNP complex (NP, VP35, VP30, and L) in the presence of a  
21 'minigenome' consisting of a reporter FLuc-encoding gene flanked by the EBOV promoter-like  
22 genomic leader and trailer sequences. Transcription is essential for minimal FLuc activity;  
23 replication is further required to achieve maximum signal (T. Hoenen et al. 2010).

24 Intriguingly, we found that NP-R111C caused similar transcription and replication activity  
25 as NP-R111, whereas the charge-reversal NP-R111E abrogated these activities. As expected,

1 absence of VP30, L, or the minigenome resulted in <5% normalized luminescence compared to  
2 cells expressing the minigenome and the entire RNP complex with NP-R111 (Figure 5).  
3 Substitution of NP-R111C in place of NP-R111 yielded similar activity (99%). On the other hand,  
4 the charge-reversal mutants NP-R111E (23% reporter activity; adj.  $p < 0.003$ ; Dunnett's test)  
5 and NP-K109E/K110E/R111E (44% reporter activity; adj.  $p < 0.017$ ; Dunnett's test) greatly  
6 attenuate transcription and/or replication. These results indicate that the NP 111 residue is  
7 connected to both the structural and transactivation roles of EBOV NP.

## 1 **Discussion**

2 Here, we developed and modified BSL-2 assays to study in-depth a key EBOV NP mutant, NP-  
3 R111C, which arose during the 2013–2016 Western African EVD epidemic. Though the NP-  
4 R111 residue has not been previously annotated as functional, NP-R111C increases VLP  
5 production and NP oligomerization, and the charge-reversal mutation NP-R111E dramatically  
6 increases NP oligomerization while hindering viral transcription and replication.

7 Many viral proteins are highly multi-functional, making study of individual mutations  
8 challenging without high-throughput, robust assays that are sensitive to subtle changes in viral  
9 phenotype. Since luciferase-based reporter systems fit the aforementioned requirements, we  
10 took advantage of these systems to develop VLP detection assays and BRET assays for NP  
11 oligomerization. As new assays always require thorough testing, we have verified that luciferase  
12 activity in these assays indeed reflects phenotype using LOF mutations (NLuc-VP40-L117R for  
13 VLP production, NP- $\Delta$ OD to assess oligomerization) and biologically relevant disruptions  
14 (heating to denature VLPs, VP35 expression to reduce NP oligomerization). These BSL-2  
15 assays are simple and flexible for testing new viral mutations as they emerge during epidemics.  
16 With more rigorous screening and quantification of key metrics of variability, like Z-factor, these  
17 assays could potentially be used for high-throughput screens of hundreds of EBOV NP mutants,  
18 interactions with host factors, or antagonism by drug candidates.

19 Although these reporter assays show that NP-R111C increases VLP production, the  
20 mechanism behind this increase remains unclear. In this study, we used co-IP-MS/MS to  
21 identify many new putative NP binding partners, since there has only been a single previous  
22 interactome study on EBOV NP (García-Dorival et al. 2016). We confirmed an interaction with  
23 the clathrin adaptor AP-1 complex (García-Dorival et al. 2016), which is of particular interest. In  
24 retroviruses, the Gag protein facilitates budding by hijacking the AP-1 complex (Camus et al.  
25 2007). Because retroviral and EBOV particles bud using the same cellular pathway and

1 machinery (Liu et al. 2010), we hypothesize that EBOV NP also co-opts the AP-1 complex for  
2 virion egress and trafficking. This interaction with the AP-1 complex could explain why  
3 expression of NP significantly enhances budding of EBOV VLPs (Licata et al. 2004). However,  
4 NP-R111 and NP-R111C bound to AP-1 with similar affinity, suggesting that this interaction was  
5 not the reason behind NP-R111C's increased ability to promote VLP production. To identify  
6 protein-protein interactions in this study, we used a standard label-free co-IP-MS/MS approach.  
7 To gain deeper mechanistic insight into this complex NP surface, researchers of future studies  
8 could apply more powerful label-based quantification approaches to identify differential  
9 interacting partners between NP-R111, NP-R111C, and NP-R111E.

10 Charge reversal at the NP residue R111, NP-R111E, further demonstrates the  
11 importance of this position to multiple essential viral life cycle functions. We show that NP-  
12 R111E is not aberrantly misfolded and degraded since it expresses similarly as NP-R111 and  
13 NP-R111C. In fact, we find that NP-R111E oligomerizes at significantly lower protein  
14 concentration compared to NP-R111, yet NP-R111E is unable to support normal levels of viral  
15 replication and transcription. Basicity at residues K109, K110, and R111 is highly conserved  
16 among nearly all immediate relatives of EBOV in the genus *Ebolavirus*, including the newly  
17 discovered Bombali virus (Goldstein et al. 2018). This high degree of conservation, despite  
18 significant evolutionary divergence between ebolaviruses, emphasizes the importance of this  
19 highly basic region to NP functions.

20 Indeed, a recent cryo-EM structure identified K110 as forming an electrostatic interaction  
21 with E349 on a neighboring NP molecule (Sugita et al. 2018), but it is not immediately apparent  
22 how changing the NP-R111 residue affects multiple viral phenotypes. The triple charge-reversal  
23 mutant NP-K109E/K110E/R111E, which presumably disrupts the K110-E349 electrostatic  
24 interaction, increases oligomerization while ablating minigenome transcription and replication.  
25 Because NP-R111E phenocopies the triple charge-reversal mutant, it is possible that NP-  
26 R111E disrupts the K110-E349 interaction as well. Intriguingly, the epidemic substitution NP-

1 R111C slightly increases oligomerization compared to NP-R111, but to a lesser extent than NP-  
2 R111E. Biochemically, 14% of cysteine residues ( $pK_a = 8.18$ ) (Nelson, Lehninger, and Cox  
3 2008) will be negatively charged at a typical intracellular pH of 7.4, in between lysine (100%  
4 positively charged) and arginine (100% negatively charged). Yet, NP-R111 and NP-R111C  
5 produce similar levels of minigenome transcription and replication, while NP-R111E and NP-  
6 K109E/K110E/R111E are significantly ablated. This correlation between side chain charge,  
7 oligomerization, and transcription and replication hints at the possibility of subtle shifts in the NP  
8 structure and/or additional electrostatic interactions that coordinate NP's ability to influence all  
9 these different functions simultaneously.

10 Findings from reporter-based assays are chiefly limited because such assays must still  
11 be supported by live virus experiments. Viral proteins like NP have multiple essential and  
12 accessory roles during infection, and despite our best efforts, we did not assay every function.  
13 There are innumerable molecular phenotypes that could not all be assayed (e.g., alterations to  
14 NP protein structure, localization, interaction binding sites, immune epitopes). Even for the  
15 functions studied here (VLP production, NP oligomerization, viral transcription/replication),  
16 predicting the effect of a mutation in an authentic live virus setting is challenging because active  
17 viral replication alters cellular pathways, and antiviral and other host pathways respond to  
18 infection. Here, we prioritized testing those phenotypes most likely to be affected based on the  
19 location of the R111 residue in the available NP crystal structures.

20 Testing whether mutations affect fitness with live virus experiments brings additional  
21 challenges because different viral stocks and cultured cells versus animal models can cause  
22 discrepancies in results. For example, the SL1 clade-defining mutation, GP-A82V, has been  
23 shown numerous times to enhance EBOV infectivity in cell culture (Diehl et al. 2016;  
24 Urbanowicz et al. 2016; Dietzel et al. 2017; Ueda et al. 2017; Hoffmann et al. 2017; Wang et al.  
25 2017), using multiple EBOV surrogate systems (EBOV VLPs, retroviral particles pseudotyped  
26 with EBOV GP, and recombinant live virus (Dietzel et al. 2017)) and multiple cell types (e.g.,



1 human monocyte-derived dendritic cells (Diehl et al. 2016)). However, results from a recent  
2 study using immunocompromised laboratory mice and non-human primates (Marzi et al. 2018)  
3 indicated that EBOV Makona viral isolates encoding GP-A82V lead to modestly decreased viral  
4 load compared those without the GP-A82V mutation. A second recent study found that GP-  
5 A82V may induce slightly more morbidity and mortality in immunocompromised mice but not in  
6 ferrets (Wong et al. 2018). Findings could differ between studies because (Marzi et al. 2018)  
7 use clinical EBOV isolates, which contain multiple non-GP-A82V mutations in the reference  
8 sequence as well as dozens of minor allele mutations. By contrast, other researchers (Diehl et  
9 al. 2016; Urbanowicz et al. 2016; Dietzel et al. 2017; Ueda et al. 2017; Hoffmann et al. 2017;  
10 Wang et al. 2017) utilize monoclonal plasmids to drive EBOV gene expression, so only the  
11 desired mutation is present. Marzi and colleagues (Marzi et al. 2018) did not observe that EBOV  
12 viral isolates encoding GP-A82V replicate more efficiently in cell culture than those without the  
13 mutation, in direct contrast to another study (Dietzel et al. 2017) which used live EBOV  
14 generated from recombinant DNA plasmids. Additional mutations in the EBOV viral isolates or  
15 differing protocols may explain the discrepancy between the two studies.

16 Limited recombinant live EBOV studies have been performed to test the impact of the  
17 NP-R111C substitution specifically. (Dietzel et al. 2017) showed that EBOV with GP-A82V and  
18 NP-R111C outcompetes an ancestral EBOV Makona in a head-to-head format in cultured cells,  
19 but did not measure the impact of NP-R111C alone. (Wong et al. 2018) found that NP-R111C  
20 alone increases viral replication in cell culture, decreases morbidity and mortality in  
21 immunocompromised mice, and does not differ from ancestral EBOV Makona in ferrets.

22 The most direct way to test whether a viral mutation has functional consequence would  
23 be to generate a recombinant live EBOV bearing the mutation of interest, and to then infect non-  
24 human primates in an animal BSL-4 setting (Marzi et al. 2018; Basler 2017). However, the vast  
25 majority of recombinant virus backbones are based on the EBOV Yambuku-Mayinga isolate  
26 (Volchkov et al. 2001; Neumann et al. 2002; Towner et al. 2005; Thomas Hoenen et al. 2013),

1 which differs from the desired EBOV Makona-C15 reference sequence by hundreds of  
2 mutations. Even an existing recombinant EBOV Makona virus backbone (Albariño et al. 2015)  
3 would require 7 or 8 back-mutations to achieve the Makona-C15 reference sequence. Future  
4 improvements in large plasmid assembly methodology (Gibson et al. 2009) will greatly facilitate  
5 the ability to rapidly generate new recombinant DNA plasmid sequence as novel EBOV variants  
6 emerge. Given current limitations and restrictions of BSL-4 settings and the severe impact and  
7 potential global threat of EVD epidemics, using BSL-2 model systems allows initial and more  
8 rapid and comprehensive exploration of any potentially consequential EBOV mutations.

9         Our finding of the importance of the R111 residue and experimental systems established  
10 represent steps towards characterizing key EBOV mutations that arose during the 2013–2016  
11 Western African EVD epidemic. These findings provide additional insight into the interplay  
12 between the many functions of NP in viral assembly and budding, oligomerization, and  
13 transcription and replication.

## 1 Materials and methods

2

## 3 Key resources table

| Reagent type (species) or source | Designation                                                     | Source or reference         | Identifiers | Additional information |
|----------------------------------|-----------------------------------------------------------------|-----------------------------|-------------|------------------------|
| cell line (H. sapiens)           | Human embryonic kidney (HEK) 293FT                              | Thermo Fisher Scientific    | R70007      |                        |
| cell line (H. sapiens)           | HEK 293                                                         | ATCC                        | CRL-1573    |                        |
| antibody                         | mouse $\alpha$ -myc, clone 9B11                                 | Cell Signaling Technologies | 2276        |                        |
| antibody                         | mouse $\alpha$ -V5, clone SV5-Pk1                               | Bio-Rad Laboratories        | MCA1360     |                        |
| antibody                         | mouse $\alpha$ -AP1G1, clone 100/3                              | Sigma-Aldrich               | A4200-.2ML  |                        |
| antibody                         | mouse $\alpha$ -VPS35, clone B-5                                | Santa Cruz Biotechnology    | sc-374372   |                        |
| antibody                         | mouse $\alpha$ -tubulin, clone B-7                              | Santa Cruz Biotechnology    | sc-5286     |                        |
| antibody                         | normal mouse IgG                                                | Santa Cruz Biotechnology    | sc-2025     |                        |
| antibody                         | Peroxidase AffiniPure Goat Anti-Mouse IgG, Light Chain Specific | Jackson ImmunoResearch      | 115-035-174 |                        |
| antibody                         | rabbit $\alpha$ -V5, clone D3H8Q                                | Cell Signaling Technologies | 13202       |                        |
| antibody                         | rabbit $\alpha$ -AP1M1, polyclonal                              | Proteintech                 | 12112-1-AP  |                        |
| antibody                         | rabbit $\alpha$ -VPS26, clone EPR13456                          | Abcam                       | ab181352    |                        |

|                         |                                                  |                                               |             |  |
|-------------------------|--------------------------------------------------|-----------------------------------------------|-------------|--|
| antibody                | normal rabbit IgG                                | Santa Cruz Biotechnology                      | sc-2027     |  |
| antibody                | Peroxidase AffiniPure Goat Anti-Rabbit IgG (H+L) | Jackson ImmunoResearch                        | 111-035-144 |  |
| recombinant DNA reagent | pGL4.23-CMV/NP-V5                                | this paper                                    |             |  |
| recombinant DNA reagent | pGL4.23-CMV/NP-myc                               | this paper                                    |             |  |
| recombinant DNA reagent | pGL4.23-CMV/eGFP-V5                              | this paper                                    |             |  |
| recombinant DNA reagent | pcDNA3.1(+)/Bla-VP40                             | BEI Resources, (Manicassamy and Rong 2009)    | NR-19813    |  |
| recombinant DNA reagent | pcDNA3.1(+)/NLuc-VP40                            | this paper                                    |             |  |
| recombinant DNA reagent | pNL1.1/NLuc                                      | Promega                                       | N1001       |  |
| recombinant DNA reagent | pcDNA3.3/KLF4                                    | Addgene (Derrick Rossi), (Warren et al. 2010) | 26815       |  |
| recombinant DNA reagent | pLV-WPRE/mCherry                                 | Addgene (Pantelis Tsoulfas)                   | 36084       |  |
| recombinant DNA reagent | pcDNA3.3/eGFP-V5                                 | this paper                                    |             |  |
| recombinant DNA reagent | pGL4.23-CMV/NP                                   | this paper                                    |             |  |
| recombinant DNA reagent | pGL4.23-CMV/GP-A82V                              | (Diehl et al. 2016)                           |             |  |
| recombinant DNA reagent | pGL4.23-CMV/NP-NLuc                              | this paper                                    |             |  |
| recombinant DNA reagent | pGL4.23-CMV/NP-HaloTag                           | this paper                                    |             |  |
| recombinant             | pcDNA3.3-                                        | this paper                                    |             |  |

|                         |                             |                                                  |       |                                           |
|-------------------------|-----------------------------|--------------------------------------------------|-------|-------------------------------------------|
| DNA reagent             | WPRE/eGFP-P2A-VP35(NPBP)-V5 |                                                  |       |                                           |
| recombinant DNA reagent | mTagBFP2-pBAD               | Addgene (Michael Davidson), (Subach et al. 2011) | 54572 |                                           |
| recombinant DNA reagent | pcDNA3.3-WPRE/mTagBFP2-V5   | this paper                                       |       |                                           |
| recombinant DNA reagent | pCAGGS/L                    | (Luke D. Jasenosky, Neumann, and Kawaoka 2010)   |       |                                           |
| recombinant DNA reagent | pCAGGS/VP30                 | (Luke D. Jasenosky, Neumann, and Kawaoka 2010)   |       |                                           |
| recombinant DNA reagent | pCAGGS/T7pol                | (Luke D. Jasenosky, Neumann, and Kawaoka 2010)   |       |                                           |
| recombinant DNA reagent | pCAGGS/FLuc                 | (Luke D. Jasenosky, Neumann, and Kawaoka 2010)   |       |                                           |
| recombinant DNA reagent | pCAGGS/RLuc                 | (Luke D. Jasenosky, Neumann, and Kawaoka 2010)   |       |                                           |
| recombinant DNA reagent | pCAGGS/NP-2A-VP35           | (Luke D. Jasenosky, Neumann, and Kawaoka 2010)   |       |                                           |
| sequence-based reagent  | NP-R111-NTerm               | Integrated DNA Technologies                      |       | GBlock with N-terminus of EBOV/Mak-C15 NP |
| sequence-based reagent  | NP-R111-CTerm               | Integrated DNA Technologies                      |       | GBlock with C-terminus of EBOV/Mak-C15    |

|                        |                    |                             |                                                              | NP                                       |
|------------------------|--------------------|-----------------------------|--------------------------------------------------------------|------------------------------------------|
| sequence-based reagent | NP-R111C-fwd       | Integrated DNA Technologies | CGTTTTGAAGT<br>CAAGAAGTGT<br>GATGGAGTGA<br>AGCGCC            | SDM primer to generate NP-R111C          |
| sequence-based reagent | NP-R111C-rev       | Integrated DNA Technologies | GGCGCTTCAC<br>TCCATCACACT<br>TCTTGACTTCA<br>AAACG            | SDM primer to generate NP-R111C          |
| sequence-based reagent | NP-R111E-fwd       | Integrated DNA Technologies | GGTCCGTTTT<br>GAAGTCAAGA<br>AGGAGGATGG<br>AGTGAAGCGC<br>CTTG | SDM primer to generate NP-R111E          |
| sequence-based reagent | NP-R111E-rev       | Integrated DNA Technologies | CAAGGCGCTT<br>CACTCCATCCT<br>CCTTCTTGACT<br>TCAAACGGA<br>ACC | SDM primer to generate NP-R111E          |
| sequence-based reagent | NP-K109E-K110E-fwd | Integrated DNA Technologies | GGGTTCCGTT<br>TTGAAGTCGA<br>GGAGGAGGAT<br>GGAGTGAAGC         | SDM primer to generate NP-K109E & -K110E |
| sequence-based reagent | NP-K109E-K110E-rev | Integrated DNA Technologies | GCTTCACTCCA<br>TCTCCTCCTC<br>GACTTCAAAC<br>GGAACCC           | SDM primer to generate NP-K109E & -K110E |
| sequence-based reagent | NP-dOD-fwd         | Integrated DNA Technologies | CGAGTCTCAC<br>TGAATCTGACA<br>TGAGAGTCAT<br>CCCAGTGTAT<br>C   | SDM primer to generate NP- $\Delta$ OD   |
| sequence-based reagent | NP-dOD-rev         | Integrated DNA Technologies | GATACACTGG<br>GATGACTCTCA<br>TGTCAGATTCA<br>GTGAGACTCG       | SDM primer to generate NP- $\Delta$ OD   |
| sequence-based reagent | NP-dC50-fwd        | Integrated DNA Technologies | GGTAAAGAGT<br>ACACGTATCC<br>GTCTAGAGGT<br>AAGCCTATCC<br>C    | SDM primer to generate NP- $\Delta$ C50  |
| sequence-based reagent | NP-dC50-rev        | Integrated DNA Technologies | GGGATAGGCT                                                   | SDM primer to                            |

|                        |                        |                             |                                                               |                                                                                      |
|------------------------|------------------------|-----------------------------|---------------------------------------------------------------|--------------------------------------------------------------------------------------|
| reagent                |                        | Technologies                | TACCTCTAGAC<br>GGATACGTGT<br>ACTCTTTACC                       | generate NP- $\Delta$ C50                                                            |
| sequence-based reagent | BspEI_eGFP-fwd         | Integrated DNA Technologies | GATGCTTCCG<br>GACCACCATG<br>GTGAGCAAGG<br>GCGA                | PCR primer to generate eGFP with restriction enzyme sites as insert                  |
| sequence-based reagent | XbaI_eGFP-rev          | Integrated DNA Technologies | TGTCCTTCTAG<br>ACTTGACAGC<br>TCGTCCATGC                       | PCR primer to generate eGFP with restriction enzyme sites as insert                  |
| sequence-based reagent | EBOV-Mak-C15-VP40      | Integrated DNA Technologies |                                                               | GBlock with EBOV/Mak-C15 to replace EBOV/Yam-May in original vector                  |
| sequence-based reagent | VP40-L117R-fwd         | Integrated DNA Technologies | CTACGGCCGC<br>CATCATGCGT<br>GCTTCATATAC<br>TATCACCC           | SDM primer to generate VP40-L117R                                                    |
| sequence-based reagent | VP40-L117R-rev         | Integrated DNA Technologies | GGGTGATAGT<br>ATATGAAGCAC<br>GCATGATGGC<br>GGCCGTAG           | SDM primer to generate VP40-L117R                                                    |
| sequence-based reagent | NP-GSGGGSGGGT-rev      | Integrated DNA Technologies | TCCTCCAGATC<br>CTCCTCCGGA<br>TCCCTGATGAT<br>GTTGCAGGAT<br>TGC | Inversion PCR primer to generate linear pGL4.23-CMV-NP as vector for Gibson assembly |
| sequence-based reagent | pGL423-CTerm-fwd       | Integrated DNA Technologies | TAATCTAGAGT<br>CGGGGCGG                                       | Inversion PCR primer to generate linear pGL4.23-CMV-NP as vector for Gibson assembly |
| sequence-based reagent | GSGGGSGGGT-HaloTag-fwd | Integrated DNA Technologies | GGAGGAGGAT<br>CTGGAGGAGG<br>TACCGAAATC<br>GGTACTGGCT          | PCR primer to generate linear HaloTag with Gly-rich spacer                           |

|                        |                     |                             |                                                                                                                        |                                                                                          |
|------------------------|---------------------|-----------------------------|------------------------------------------------------------------------------------------------------------------------|------------------------------------------------------------------------------------------|
|                        |                     |                             | TTCC                                                                                                                   | as insert for Gibson assembly                                                            |
| sequence-based reagent | pGL423-HaloTag-rev  | Integrated DNA Technologies | CCGCCCCGAC<br>TCTAGATTAAC<br>CGGAAATCTC<br>CAGAGT                                                                      | PCR primer to generate linear HaloTag with Gly-rich spacer as insert for Gibson assembly |
| sequence-based reagent | GSGGGSGGGT-nLuc-fwd | Integrated DNA Technologies | GGAGGAGGAT<br>CTGGAGGAGG<br>TACCATGGTCT<br>TCACACTCGAA<br>GA                                                           | PCR primer to generate linear nLuc with Gly-rich spacer as insert for Gibson assembly    |
| sequence-based reagent | pGL423-nLuc-rev     | Integrated DNA Technologies | CCGCCCCGAC<br>TCTAGATTACG<br>CCAGAATGCG<br>TTCCG                                                                       | PCR primer to generate linear nLuc with Gly-rich spacer as insert for Gibson assembly    |
| sequence-based reagent | pcDNA-EGFP-fwd      | Integrated DNA Technologies | GACCGATCCA<br>GCCTCCACCA<br>TGGTGAGCAA<br>GG                                                                           | PCR primer to generate linear EGFP with P2A peptide as insert for Gibson assembly        |
| sequence-based reagent | P2A-EGFP-rev        | Integrated DNA Technologies | AGGTCCAGGG<br>TTCTCCTCCAC<br>GTCTCCAGCC<br>TGCTTCAGCA<br>GGCTGAAGTT<br>AGTAGCTCCG<br>CTTCCCTTGTA<br>CAGCTCGTCC<br>ATGC | PCR primer to generate linear EGFP with P2A peptide as insert for Gibson assembly        |
| sequence-based reagent | pGL423-N-P2A-rev    | Integrated DNA Technologies | GCCCTTTGTTC<br>TAGTTGTCATA<br>GGTCCAGGGT<br>TCTCCTC                                                                    | PCR primer to generate linear EGFP with P2A peptide as insert for Gibson assembly        |
| sequence-based         | EBOV-Mak-C15-       | Integrated DNA              | GCCCTTTGTTC                                                                                                            | GBlock with full-                                                                        |



|                              |                                                     |                             |                                                              |                                                                         |
|------------------------------|-----------------------------------------------------|-----------------------------|--------------------------------------------------------------|-------------------------------------------------------------------------|
| reagent                      | VP35                                                | Technologies                | TAGTTGTCATA<br>GGTCCAGGGT<br>TCTCCTC                         | length<br>EBOV/Mak-C15<br>VP35                                          |
| sequence-based reagent       | VP35-fwd                                            | Integrated DNA Technologies | ATGACAACCTAG<br>AACAAAGGGC<br>A                              | PCR primer to generate linear VP35(NPBP) as insert for Gibson assembly  |
| sequence-based reagent       | V5-VP35-80aa-rev                                    | Integrated DNA Technologies | GTTAGGGATA<br>GGCTTACCTTA<br>TTAATTGCAAA<br>TTGGGTCCGT<br>TT | PCR primer to generate linear VP35(NPBP) as insert for Gibson assembly  |
| sequence-based reagent       | BspEI_mTagBFP2-fwd                                  | Integrated DNA Technologies | GATGTCTCCG<br>GACCACCATG<br>GTGTCTAAGG<br>GCGAAGA            | PCR primer to generate mTagBFP2 with restriction enzyme sites as insert |
| sequence-based reagent       | XbaI_mTagBFP2-rev                                   | Integrated DNA Technologies | TGTCCATCTAG<br>AATTAAGCTTG<br>TGCCCCAGTT                     | PCR primer to generate mTagBFP2 with restriction enzyme sites as insert |
| peptide, recombinant protein | SureBeads Protein A Magnetic Beads, 3 ml            | Bio-Rad Laboratories        | 1614013                                                      |                                                                         |
| peptide, recombinant protein | SureBeads Protein G Magnetic Beads, 3 ml            | Bio-Rad Laboratories        | 1614023                                                      |                                                                         |
| peptide, recombinant protein | Protein A/G PLUS-Agarose                            | Santa Cruz Biotechnology    | sc-2003                                                      |                                                                         |
| peptide, recombinant protein | Phusion High-Fidelity PCR Master Mix with GC Buffer | New England Biolabs         | M0532L                                                       |                                                                         |
| commercial assay or kit      | Nano-Glo Luciferase Assay System                    | Promega                     | N1120                                                        |                                                                         |

|                         |                                                           |                          |          |  |
|-------------------------|-----------------------------------------------------------|--------------------------|----------|--|
| commercial assay or kit | NanoBRET Nano-Glo Detection System                        | Promega                  | N1662    |  |
| commercial assay or kit | Dual-Luciferase Reporter Assay System                     | Promega                  | E1980    |  |
| chemical compound, drug | DMEM, high glucose, GlutaMAX Supplement, HEPES            | Thermo Fisher Scientific | 10564029 |  |
| chemical compound, drug | Fetal Bovine Serum, certified, One Shot format, US origin | Thermo Fisher Scientific | A3160402 |  |
| chemical compound, drug | Penicillin-Streptomycin                                   | Thermo Fisher Scientific | 15140122 |  |
| chemical compound, drug | MEM Non-Essential Amino Acids Solution (100X)             | Thermo Fisher Scientific | 11140050 |  |
| chemical compound, drug | Sodium Pyruvate (100mM)                                   | Thermo Fisher Scientific | 11360070 |  |
| chemical compound, drug | Opti-MEM I Reduced Serum Media                            | Thermo Fisher Scientific | 31985062 |  |
| chemical compound, drug | Opti-MEM I Reduced Serum Medium, no phenol red            | Thermo Fisher Scientific | 11058021 |  |
| chemical compound, drug | Lipofectamine 2000 Transfection Reagent                   | Thermo Fisher Scientific | 11668019 |  |
| chemical compound, drug | TransIT-LT1                                               | Mirus Bio                | MIR 2300 |  |
| chemical compound, drug | PBS, pH 7.4                                               | Thermo Fisher Scientific | 10010049 |  |

|                         |                                                      |                                                            |             |                       |
|-------------------------|------------------------------------------------------|------------------------------------------------------------|-------------|-----------------------|
| chemical compound, drug | Sucrose                                              | Sigma-Aldrich                                              | 84097-250G  |                       |
| chemical compound, drug | Polyvinylpyrrolidone                                 | Sigma-Aldrich                                              | 234257-5G   |                       |
| chemical compound, drug | Dimethyl sulfoxide, ReagentPlus, ≥99.5%              | Sigma-Aldrich                                              | D5879-100ML |                       |
| chemical compound, drug | PageBlue Protein Staining Solution                   | Thermo Fisher Scientific                                   | 24620       |                       |
| chemical compound, drug | 2x Laemmli Sample Buffer                             | Bio-Rad Laboratories                                       | 1610737     |                       |
| chemical compound, drug | SuperSignal West Pico Chemiluminescent Substrate     | Thermo Fisher Scientific                                   | 34078       |                       |
| software, algorithm     | Virus Pathogen Database and Analysis Resource (ViPR) | (Pickett et al. 2012)                                      |             | Accessed October 2017 |
| software, algorithm     | MAFFT                                                | (Katoh and Standley 2013)                                  | v6.902b     |                       |
| software, algorithm     | trimAl                                               | (Capella-Gutiérrez, Silla-Martínez, and Gabaldón 2009)     | v1.4        |                       |
| software, algorithm     | RAxML                                                | (Stamatakis, Ludwig, and Meier 2005)                       | v7.3.0      |                       |
| software, algorithm     | PyMOL                                                | Schrödinger, (Schrödinger, LLC 2015)                       | v2.0.3      |                       |
| software, algorithm     | ImageJ                                               | (Schneider, Rasband, and Eliceiri 2012)                    |             |                       |
| software, algorithm     | SEQUEST                                              | Thermo Fisher Scientific, (Eng, McCormack, and Yates 1994) |             |                       |

|                     |                                                                             |                                     |        |                        |
|---------------------|-----------------------------------------------------------------------------|-------------------------------------|--------|------------------------|
| software, algorithm | Contaminant Repository for Affinity Purification (CRAPome)                  | (Mellacheruvu et al. 2013)          | v1.1   | Accessed November 2015 |
| software, algorithm | Search Tool for the Retrieval of Interacting Genes/proteins (STRING)        | (Snel 2000; Szklarczyk et al. 2015) | v10    | Accessed November 2015 |
| software, algorithm | Cytoscape                                                                   | (Shannon et al. 2003)               | v3.4.0 |                        |
| software, algorithm | Prism                                                                       | GraphPad Software                   | v7.0c  |                        |
| software, algorithm | R                                                                           | (R Core Team 2016)                  | v3.3.1 |                        |
| software, algorithm | nlstools' package in R                                                      | (Baty et al. 2015)                  | v1.0-2 |                        |
| software, algorithm | ggplot2' package in R                                                       | (Wickham 2016)                      | v2.2.1 |                        |
| other               | 0.45 $\mu$ m, Acrodisc Syringe Filter with HT Tuffryn Membrane              | Pall Laboratory                     | 4184   |                        |
| other               | BioCoat Poly-D-Lysine 6-well Clear Flat Bottom TC-treated Multiwell Plate   | Corning                             | 356413 |                        |
| other               | 96-well Black Flat Bottom Polystyrene NBS Microplate                        | Corning                             | 3991   |                        |
| other               | BioCoat Poly-D-Lysine 96-well Black/Clear Flat Bottom TC-treated Microplate | Corning                             | 356640 |                        |

|       |                                                                  |                      |         |  |
|-------|------------------------------------------------------------------|----------------------|---------|--|
| other | 4–15% Mini-PROTEAN TGX Precast Protein Gels, 10-well, 30 $\mu$ L | Bio-Rad Laboratories | 4561083 |  |
|-------|------------------------------------------------------------------|----------------------|---------|--|

1

## 2 **Ebola virus genome sequences and phylogenetic analysis**

3 We obtained Ebola virus (EBOV) genomes from the US National Institute of Allergy and  
4 Infectious Diseases (NIAID) Virus Pathogen Database and Analysis Resource (ViPR) through  
5 the web site at <http://www.viprbrc.org/> (Pickett et al. 2012) on October 2017. We removed short  
6 sequences, sequences from tissue-cultured EBOV isolates, duplicate sequences from the same  
7 clinical EVD case, and sequences with >0.2% ambiguous or missing nucleotide calls. The final  
8 dataset consisted of 1,823 EBOV complete or near-complete genomes.

9 We aligned these genomes with MAFFT v6.902b (Katoch and Standley 2013) using the  
10 parameters (L-INS-i):-localpair-maxiterate 1000-reorder-ep 0.123. We trimmed the alignment  
11 using trimAl v1.4 (Capella-Gutiérrez, Silla-Martínez, and Gabaldón 2009) with -automated1.  
12 Lastly, we generated a maximum likelihood tree with RAxML v7.3.0 (Stamatakis, Ludwig, and  
13 Meier 2005) under a generalized time-reversible (GTR $\gamma$ ) nucleotide substitution model with 100  
14 bootstrap pseudoreplicates.

15 For functional characterization, we used the genome sequence of Ebola virus/H.sapiens-  
16 wt/GIN/2014/Makona-C15 (EBOV/Mak-C15; GenBank #KJ660346.2; *Filoviridae*: *Zaire*  
17 *ebolavirus*) as the EBOV Makona variant reference sequence for NP, VP40, VP35, and GP  
18 analyses and cloning, unless otherwise noted. The structural analysis of EBOV NP was based  
19 on the Ebola virus/H.sapiens-tc/COD/1976/Yambuku-Mayinga NP (EBOV/Yam-May) crystal  
20 structure under Protein Data Bank (PDB) #4YPI (Leung et al. 2015), with manual annotation of  
21 key residues based on results of other studies (Leung et al. 2015; Kirchdoerfer et al. 2015). The  
22 structure of EBOV/Mak-C15 NP has not yet been elucidated, but the amino acid sequence is  
23 98% identical (14 mutations / 739 residues) to EBOV/Yam-May NP, and the N-terminal 450

1 amino acids of the two variants are 99.3% identical (3 mutations / 450 residues). The  
2 subtomogram averaged electron microscopy (EM) NP structure (also derived from EBOV/Yam-  
3 May) was accessed from PDB #6EHL (Wan et al. 2017). We visualized all structures using  
4 PyMOL (Schrödinger, New York City, NY) (Schrödinger, LLC 2015).

5

## 6 **Constructs and cloning**

7 We performed all assays with the same mammalian expression vector for EBOV NP and its  
8 mutants. We synthesized EBOV NP-R111 in 2 dsDNA gBlocks (Integrated DNA Technologies  
9 [IDT], Coralville, IA) and cloned these into pGL4.23-CMV (described in (Diehl et al. 2016))  
10 modified with a C-terminal V5 peptide tag. To generate all NP mutants, we performed a  
11 modified site-directed mutagenesis (SDM) protocol on this plasmid, as described in (Diehl et al.  
12 2016). For many assays, we expressed enhanced green fluorescent protein (eGFP) in place of  
13 NP as a negative control; we generated the corresponding vector by cloning eGFP into  
14 pcDNA3.3-CMV (Thermo Fisher Scientific, Waltham, MA) modified by a sequence encoding an  
15 in-frame C-terminal V5 peptide tag.

16 For the VLP budding assay, we additionally constructed a plasmid to express a  
17 NanoLuc-EBOV Makona-C15 VP40 (NLuc-VP40) fusion protein. To create this plasmid, we  
18 obtained a pcDNA3.1(+)-based vector expressing  $\beta$ -lactamase (Bla) fused to EBOV/Yam-May  
19 (Bla-VP40) through the US National Institutes of Health (NIH)/NIAID Biodefense and Emerging  
20 Infections Research Resources Repository (BEI Resources, Manassas, VA; #NR-19813)  
21 (Manicassamy and Rong 2009). We replaced the *Bla* gene with the gene encoding NanoLuc  
22 (NLuc) from pNL1.1 (Promega, Madison, WI), and replaced the EBOV/Yam-May VP40  
23 sequence with that of EBOV/Mak-C15 from a gBlock (IDT). pNL1.1, which expresses NLuc  
24 alone without VP40, was used as a negative control. As an additional negative control, we  
25 performed SDM to introduce a VP40 L117R mutation into the NLuc-VP40-encoding vector  
26 based on loss-of-function (LOF) induced by this mutation as reported in (Bornholdt et al. 2013).

1 For EM experiments, we additionally co-expressed EBOV glycoprotein (GP) from a pGL4.23-  
2 CMV vector (Diehl et al. 2016).

3 For co-immunoprecipitation (co-IP) and oligomerization studies, we generated numerous  
4 versions of EBOV/Mak-C15 NP in the pGL4.23-CMV backbone. For a traditional dual-tag co-IP-  
5 western blot (WB) strategy, we generated pGL4.23-CMV/NP-myc and pGL4.23-CMV/NP-V5,  
6 with both tags at the C-terminus of the fusion protein. For the bioluminescence resonance  
7 energy transfer (BRET) oligomerization assay, we replaced the C-terminal V5 tag with either a  
8 HaloTag or a NLuc tag from the NanoBRET Nano-Glo Detection System (Promega). As a  
9 negative control, we generated NP- $\Delta$ OD by SDM to remove NP amino acids 20–38, thereby  
10 abrogating NP oligomerization (Kirchdoerfer et al. 2015).

11 For BRET experiments aimed at studying the NP-VP35 interaction, we modified the  
12 pcDNA3.3 backbone (pcDNA3.3/KLF4 was a gift from Derrick Rossi; Addgene, Cambridge, MA;  
13 plasmid #26815) (Warren et al. 2010) with a V5 peptide tag and a woodchuck hepatitis virus  
14 post-transcriptional regulatory element (WPRE) to increase insert expression, using pLV-  
15 WPRE/mCherry, a gift from Pantelis Tsoulfas (Addgene; plasmid #36084) as source material.  
16 We then cloned in eGFP, porcine teschovirus 1 2A peptide (P2A) (Kim et al. 2011), and  
17 EBOV/Mak-C15 VP35 from a gBlock (IDT) into a single open reading frame (ORF) upstream of  
18 the WPRE. The NP-binding peptide (NPBP) of EBOV VP35 was cloned in a similar manner, but  
19 only included amino acids 1–80 (Kirchdoerfer et al. 2015). As a negative control, we also cloned  
20 mTagBFP2 into the pcDNA3.3-WPRE-V5 backbone, using mTagBFP2-pBAD, a gift from  
21 Michael Davidson (Addgene; plasmid #54572) (Subach et al. 2011) as source material .

22

23 For minigenome experiments, plasmids are described in (Luke D. Jasenosky, Neumann, and  
24 Kawaoka 2010). In this system, EBOV RNA-dependent RNA polymerase (L), viral cofactor  
25 proteins (VP30 and VP35), and NP were derived from EBOV/Yam-May and expressed from a

1 pCAGGS vector. We replaced EBOV/Yam-May NP with EBOV/Mak-C15 NP and its variants  
2 before measuring minigenome activity.

3

#### 4 **Cell culture and plasmid transfections**

5 Unless otherwise specified, we grew human embryonic kidney (HEK) 293FT cells (Thermo  
6 Fisher Scientific; #R70007) in Dulbecco's modified Eagle medium (DMEM) containing 10% fetal  
7 bovine serum, 100 U/mL penicillin/streptomycin, non-essential amino acids, and sodium  
8 pyruvate (Thermo Fisher Scientific), at 37 °C with 5% CO<sub>2</sub>.

9 For most assays, we performed lipid-based reverse transfection using Lipofectamine  
10 2000 (Thermo Fisher Scientific). For a 6-well plate, we incubated 2 µg of plasmid DNA with 125  
11 µL of Opti-MEM (Thermo Fisher Scientific) at room temperature for 5 min. We incubated this  
12 mixture with 10 µL of Lipofectamine 2000 in 115 µL of Opti-MEM at room temperature for 45  
13 min. We added all 250 µL of the DNA:lipid mixture to a well of a 6-well plate, and then added  
14 trypsin-harvested cells. For smaller or larger plates, amounts were scaled accordingly. For  
15 BRET experiments, we used Opti-MEM without phenol red (Thermo Fisher Scientific) to  
16 minimize background fluorescence from culture media.

17 For the minigenome assay and electron microscopy, we performed forward transfection  
18 by incubating DNA with TransIT-LT1 (Mirus Bio, Madison, WI) in a 1:3 DNA:reagent ratio in  
19 Opti-MEM for 20 min at room temperature, and then added the mixture dropwise onto cells in 6-  
20 or 12-well plates.

21

#### 22 **Virion-like particle (VLP) budding assay**

23 We grew cells to near confluency, harvested following trypsinization, reverse-transfected, and  
24 plated them in 6-well poly-D-lysine plates (Corning, Corning, NY). We reverse-transfected each



1 well with 50 ng of pcDNA3.1/NLuc-VP40 or pNL1.1/NLuc negative control and 2000 ng of  
2 pGL4.23-CMV/NP-V5, NP mutants, or pcDNA3.3/eGFP negative control.

3 At 16 h post-transfection, we removed supernatant, washed the cells with DMEM, and  
4 added 1.5 mL of fresh DMEM. 24 h later (40 h post-transfection), we harvested culture  
5 supernatant and filtered it through an Acrodisc 0.45  $\mu$ m low protein-binding filter (Pall  
6 Laboratory, Port Washington, NY). We overlaid 1 mL of filtered supernatant with 1 mL of 20%  
7 (w/v) sucrose (Sigma-Aldrich) in phosphate-buffered saline (PBS) and ultracentrifuged at  
8 222,000  $\times$   $g$  at 4  $^{\circ}$ C for 2 h. We aspirated the supernatant and sucrose, and resuspended the  
9 pellet in 170  $\mu$ L of PBS and rocked at room temperature for 1 h. We aliquoted resuspended  
10 VLPs into 3  $\times$  50  $\mu$ L as technical triplicates, added 50  $\mu$ L of Nano-Glo assay reagent (Promega)  
11 to each replicate, and incubated in 96-well non-binding-surface plates (Corning) in the dark at  
12 room temperature for 10 min. We measured total luminescence on a SpectraMax L (Molecular  
13 Devices, Sunnyvale, CA) over a 1 s integration. Technical triplicates were averaged and  
14 considered as a single biological replicate. For each NP mutant and control, we performed 6  
15 biological replicates.

16 For the thermal stability assay, the same protocol was used with reverse transfection of  
17 50 ng of pcDNA3.1/NLuc-VP40 per well, except that we heated 1.2 mL of filtered supernatant  
18 on a Mastercycler pro S thermocycler (Eppendorf, Hamburg, Germany) at 4, 22, 37.1, 43.8,  
19 60.2, or 95  $^{\circ}$ C, for 30 min. We saved 50  $\mu$ L of sample at each temperature point for direct NLuc  
20 measurement. Subsequently, we carried out the remainder of the standard protocol described  
21 above by ultracentrifugation of 1 mL of heated supernatant through sucrose to purify VLPs, and  
22 subsequent measurement of NLuc activity as described above. For each temperature, we  
23 performed 3 biological replicates.

24

## 1 **Electron Microscopy (EM)**

2 We seeded  $6 \times 10^5$  HEK 293 cells per well in 6-well plates. The following day, we transfected  
3 each well with 1250 ng of pcDNA3.1(+)-VP40 (untagged), 930 ng of pGL4.23-CMV/NP or  
4 pGL4.23-CMV/NP-R111C (both untagged), and 310 ng of pGL4.23-CMV/GP-A82V (Diehl et al.  
5 2016) using 6.25 $\mu$ l of TransIT-LT1 (Mirus Bio). We changed media the next morning. 48 h later,  
6 we harvested culture supernatant, filtered it through a 0.45  $\mu$ m filter, and overlaid it on a 20%  
7 (w/v) sucrose in TNE (10 mM Tris-Cl, 100 mM NaCl, 1 mM EDTA pH 7.5) cushion. VLPs were  
8 pelleted by ultracentrifugation at 222,000  $\times g$  for 2 h at 4 °C. We aspirated the supernatant and  
9 sucrose, washed the pellet gently with 1 mL of ice-cold PBS, and resuspended VLPs in 100  $\mu$ L  
10 of 2% FBS in PBS and stored VLPs at 4 °C prior to EM.

11 We prepared samples for EM based on our previously described protocol (Gao and  
12 Hendricks 2012). Briefly, we performed all spreads on freshly prepared Carbon stabilized  
13 Formvar Support films on 200 mesh copper grids. We adsorbed VLPs onto a carbon-coated  
14 Formvar support films for 30 s. We removed excess liquid with filter paper and negatively  
15 stained the samples immediately by running 6 drops of 1% uranyl acetate over the grid to  
16 contrast the VLPs. We removed excess stain and air-dried the samples in a controlled humidity  
17 chamber. We then examined the samples using a FEI Tecnai 12 Spirit BioTwin transmission  
18 electron microscope (Thermo Fisher Scientific) using an accelerating voltage of 120 Kv. We  
19 captured micrographs at various magnifications to record the fine structure of VLPs and  
20 exported micrographs into ImageJ (Schneider, Rasband, and Eliceiri 2012) to measure the  
21 length and volume of individual particles.

22

## 23 **Co-immunoprecipitation (co-IP)**

24 We washed cells in 6-well plates with PBS, harvested by scraping, pelleted, and resuspended  
25 cells in 30  $\mu$ L of 1.2% (w/v) polyvinylpyrrolidone (PVP) in 20 mM 4-(2-hydroxyethyl)-1-

1 piperazineethanesulfonic acid (HEPES) buffer pH 7.4, and snap-froze with liquid nitrogen. We  
2 lysed cells with 250–500  $\mu$ L of pre-chilled lysis buffer with end-over-end rotation at 4 °C for 30  
3 min, pelleted membranous debris at 8000  $\times$   $g$  at 4 °C for 10 min, and saved an aliquot as input.  
4 To capture the target protein, we prepared a mixture of 25  $\mu$ L each of Protein A and Protein G  
5 SureBeads Magnetic Beads (Bio-Rad), and bound 1–2  $\mu$ g of primary antibody by rotation at  
6 room temperature for 20 min. We washed the bead-antibody complexes thrice with lysis buffer,  
7 and then incubated with cleared cell lysate while rotating the mixture at 4 °C for 2 h. After  
8 capture, we washed beads six times with wash buffer followed by a final wash with PBS, and  
9 eluted proteins by boiling in 50  $\mu$ L of Laemmli sample buffer (Bio-Rad) at 95 °C for 10 min. We  
10 separated proteins by sodium dodecyl sulfate polyacrylamide gel electrophoresis (SDS-PAGE)  
11 and detected proteins of interest by chemiluminescent WB.

12 For reciprocal co-IP experiment in Figure 4B, we instead captured protein complexes  
13 with Protein A/G PLUS-Agarose beads (Santa Cruz Biotechnology, Dallas, TX). In this setup,  
14 we first incubated cleared cell lysate with 1–2  $\mu$ g of primary antibody, rotated at 4 °C for 2–4 h,  
15 and then added 40  $\mu$ L of protein A/G agarose beads, and rocked at 4 °C overnight. We washed  
16 bead-antibody complexes four times with wash buffer, twice with PBS, and eluted proteins as  
17 described above.

18 For the dual-tag co-IP-WB for NP oligomerization, we used RIPA buffer (50 mM Tris pH  
19 6.8, 150 mM NaCl, 0.5% (w/v) sodium deoxycholate, 1% (w/v) Triton X-100 (Sigma-Aldrich)) as  
20 both the lysis and wash buffer because the NP-NP interaction is very strong (Watanabe, Noda,  
21 and Kawaoka 2006).

22

### 23 **Western blot (WB)**

24 We loaded the specified amount of input into 10% acrylamide SDS gels, and ran at 180 V until  
25 complete. We transferred protein to Immun-Blot PVDF membranes (Bio-Rad) in a wet tank  
26 either at 200 mA for 1.5 h at 4 °C, or at 40 V overnight at 4 °C. We blocked membranes by

1 rocking in blocking buffer consisting of 5% non-fat dry milk (Santa Cruz Biotechnology)  
2 dissolved in tris-buffered saline with 0.1% Tween 20 (TBS-T) buffer for 1 hr at room  
3 temperature. We incubated membranes with primary antibody in blocking buffer for 45 mins,  
4 washed the membrane three times in TBS-T, incubated with HRP-conjugated secondary  
5 antibody in blocking buffer for 1 hr, and washed the membrane three times. We detected  
6 chemiluminescence with SuperSignal West Pico Chemiluminescent Substrate (Thermo Fisher  
7 Scientific), and imaged with an AlphaInnotech Chemilmager (ProteinSimple, San Jose, CA) or  
8 FluorChem E (ProteinSimple) CCD camera.

9  
10

## 11 **BRET NP oligomerization assay**

12 We grew cells to near confluency, harvested by trypsinization, reverse-transfected, and plated  
13 cells in poly-D-lysine 96-well black/clear flat bottom plates (Corning). We reverse-transfected  
14 each well with 10 ng of pGL4.23-CMV/NP-NLuc or pNL1.1/NLuc negative control and 100 ng of  
15 pGL4.23-CMV/NP-HaloTag or pcDNA3.3/eGFP negative control. At the start of transfection, we  
16 also added dimethylsulfoxide (DMSO) control or HaloTag NanoBRET 618 ligand in DMSO  
17 (NanoBRET Nano-Glo Detection System, Promega) to cell culture media at a final concentration  
18 of 100 nM.

19 At 24 h post-transfection, we added 1:100 NanoBRET Nano-Glo Substrate, incubated  
20 cells in the dark at room temperature for 45 min, and measured luminescence on a DTX880  
21 Multimode Detector (Beckman Coulter, Brea, CA) with emission filters of 625/35 nm (HaloTag  
22 ligand acceptor signal), and then 465/35 nm (NLuc donor signal), both over 1 s integrations. We  
23 calculated BRET signal as the 625 nm / 465 nm ratio for a sample subtracted by the same ratio  
24 for its corresponding DMSO (no HaloTag ligand) control, per manufacturer's protocol.

25 For the VP35 inhibition experiment, we reverse-transfected each well with 2 ng of  
26 pGL4.23-CMV/NP-NLuc and 10 ng of pGL4.23-CMV/NP-HaloTag. To test a range of

1 VP35(NPBP) expression, we co-transfected decreasing amounts of pcDNA3.3-WPRE/eGFP-  
2 P2A-VP35(NPBP) plasmid. To ensure that each well received the same total amount of DNA,  
3 we also co-transfected increasing amounts of control pcDNA3.3-WPRE/mTagBFP2 plasmid.  
4 We serially diluted pcDNA3.3-WPRE/eGFP-P2A-VP35(NPBP) plasmid in control pcDNA3.3-  
5 WPRE/mTagBFP2 plasmid, as described in the manufacturer's protocol. We performed the  
6 remainder of the standard BRET protocol as described above and collected 3 biological  
7 replicates.

8 For the donor saturation setup, we reverse-transfected all wells with 2 ng of pGL4.23-  
9 CMV/NP-NLuc. To test a range of NP-HaloTag expression, we co-transfected decreasing  
10 amounts (80, 20, 5, 0 ng) of pGL4.23-CMV/NP-HaloTag or pcDNA3.3/eGFP negative control.  
11 To ensure that each well received the same total amount of DNA, we also co-transfected  
12 increasing amounts of control pcDNA3.3/eGFP plasmid. We serially diluted pGL4.23-CMV/NP-  
13 HaloTag or pcDNA3.3/eGFP in control pcDNA3.3/eGFP plasmid, as described in the  
14 manufacturer's protocol. We collected 6 biological replicates for each NP mutant and controls.

15

## 16 **Minigenome assay**

17 Screening of NP mutants was done as described in (Luke D. Jasenosky, Neumann, and  
18 Kawaoka 2010). We seeded HEK 293T cells into 12-well plates, grew to 70% confluence, and  
19 transfected with 2 µg of pCAGGS/L, 0.25 µg of pCAGGS/VP30, 0.5 µg of pCAGGS/T7pol, 0.5  
20 µg of 3E5E/T7-FLuc, 0.1 µg of pCAGGS/RLuc, and 0.75 µg of pCAGGS/NP-2A-VP35 for each  
21 NP mutant. After 2 days, we washed and lysed cells with 100 µL of 1X Passive Lysis Buffer  
22 (Dual Luciferase Assay Kit, Promega), freeze-thawed lysates, and cleared by centrifugation. We  
23 incubated 10 µL of lysate with 50 µL of Luciferase Assay Reagent II, allowed the mixture to  
24 settle for 2 s, and integrated luminescence for 10 s on a Spark 10M microplate reader (Tecan,  
25 Zürich, Switzerland) to measure FLuc activity. We then added 50 µL of Stop & Glow reagent  
26 and integrated luminescence for 10 s to measure RLuc activity. FLuc activity from the EBOV

1 minigenome was normalized to the co-transfected RLuc control. Data are presented as the  
2 percent of the ancestral EBOV/Mak-C15 NP normalized FLuc activity and represent the result of  
3 three replicates.

4

## 5 **Co-IP and Tandem Mass Spectrometry (MS/MS)**

6 For mass spectrometry and reciprocal co-IPs of AP1 protein complexes, we used the mild lysis  
7 and wash buffers, slightly modified from another study (Lin et al. 2013). Mild buffer consisted of  
8 20 mM K-HEPES buffer pH 7.4, 100 mM NaOAc, 2 mM MgCl<sub>2</sub>, 0.1% (v/v) Tween 20, 250 mM  
9 NaCl, 0.5% (v/v) Triton X-100, 4 µg/mL DNase I (QIAGEN, Hilden, Germany), 2 µg/mL RNase A  
10 (QIAGEN), 1/200 (v/v) each phosphatase inhibitor cocktails 2 and 3 (Sigma-Aldrich), and 1/100  
11 (v/v) protease inhibitor mixture (Sigma-Aldrich). Wash buffer consisted of 20 mM K-HEPES pH  
12 7.4, 100 mM NaOAc, 2 mM MgCl<sub>2</sub>, 0.1% (v/v) Tween 20, 500 mM NaCl, and 0.5% (v/v) Triton  
13 X-100.

14 To assess protein-protein interactions of NP, we scaled up our co-IP protocol. We grew  
15 two 15-cm<sup>2</sup> plates of cells to 40–60% confluence and transfected with 32 µg of pGL4.23-  
16 CMV/NP-myc encoding either the NP-R111 or the NP-K109E/K110E/R111E mutants. After 48  
17 h, we harvested cells by scraping and lysed in 2.5 mL of mild lysis buffer.

18 We performed co-IP of myc-tagged NP complexes using 25 µg of mouse α-myc IgG or  
19 irrelevant normal mouse IgG at 4° C overnight, and bound complexes to 250 µL of protein A/G  
20 agarose beads at 4° C for 2 h. We washed beads as described above and eluted proteins in  
21 120 µL of Laemmli sample buffer at 95 °C for 10 min. We separated proteins by SDS-PAGE,  
22 visualized with PageBlue Protein Staining Solution (Thermo Fisher), and excised lanes  
23 excluding IgG chains.

24 We cut gel bands into approximately 1-mm<sup>3</sup> pieces and performed a modified in-gel  
25 trypsin digestion procedure (Shevchenko et al. 1996). We dehydrated pieces with acetonitrile for  
26 10 min, dried them completely in a speed-vac pump, and rehydrated with 50 mM ammonium

1 bicarbonate solution containing 12.5 ng/μl of modified sequencing-grade trypsin (Promega) at 4  
2 °C for 45 min. To extract peptides, we replaced the solution with 50 mM trypsin-free ammonium  
3 bicarbonate solution and incubated at 37 °C overnight. We washed once with 50% acetonitrile  
4 and 1% formic acid, dried in a speed-vac pump for ~1 h and then stored at 4 °C. On the day of  
5 analysis, we reconstituted peptides in 5–10 μl of high-performance liquid chromatography  
6 (HPLC) solvent A (2.5% acetonitrile, 0.1% formic acid). We packed nano-scale reverse-phase  
7 HPLC capillary columns with 2.6 μm C18 spherical silica beads into fused silica capillary tubes  
8 (100 μm inner diameter x ~25 cm length) using flame-drawn tips (Peng and Gygi 2001). After  
9 equilibrating the columns, we loaded each sample via a Famos autosampler (LC Packings, San  
10 Francisco, CA). Peptides were eluted with increasing concentrations of solvent B (97.5%  
11 acetonitrile, 0.1% formic acid).

12 Peptides were detected by MS/MS on an LTQ Orbitrap Velos Pro ion-trap mass  
13 spectrometer (Thermo Fisher). We matched MS/MS fragmentation spectra to human forward  
14 protein databases and against reverse databases to a 1–2% false discovery rate using the  
15 SEQUEST database search program (Thermo Fisher) (Eng, McCormack, and Yates 1994). We  
16 computed unique and total peptide spectra matches (PSMs) for each identified protein.

17 To generate a list of putative NP interacting partners, we filtered proteins with at least 2  
18 unique PSMs in co-IPs of both NP-R111 and NP-K109E/K110E/R111E, and at least 2-fold  
19 greater-than-average PSM enrichment of α-myc co-IP over both IgG controls combined. To  
20 eliminate abundant and ‘sticky’ proteins, we normalized average PSM enrichment against PSMs  
21 identified in all 411 Contaminant Repository for Affinity Purification (CRAPome) version 1.1  
22 experiments (Mellacheruvu et al. 2013), a collection of proteins identified in negative control  
23 isolations. From each replicate, we used the top 10% proteins enriched versus CRAPome  
24 experiments for Search Tool for the Retrieval of Interacting Genes/proteins (STRING) version  
25 10 analysis (Snel 2000; Szklarczyk et al. 2015) and visualized interactions with Cytoscape

1 (Shannon et al. 2003). See Supplementary file S1 for raw and filtered peptide/protein PSM  
2 counts.

3

#### 4 **Statistical analysis**

5 We performed all hypothesis testing using Prism 7 (GraphPad Software, La Jolla, CA) and all  
6 non-linear curve fitting using R (R Core Team 2016) and the 'nlstools' package (Baty et al.  
7 2015). We generated most plots using the 'ggplot2' package in R (Wickham 2016).

8 We quantified raw NLuc intensities from VLPs produced from expression of NLuc-VP40,  
9 NLuc-VP40-L117R, or NLuc alone with n = 6 biological replicates each. To assess statistical  
10 significance, we performed a repeated measures ANOVA (rANOVA) with Dunnett's post-test in  
11 which each condition was compared to NLuc-VP40 to generate an adjusted p-value.

12 To measure the impact of NP genotype on VLP production, we co-expressed NLuc-  
13 VP40 and NP-R111 or NP mutants (R111C, R111E, K109E/K110E/R111E,  $\Delta$ C50 - a 50 amino  
14 acid truncation of the NP C-terminus (Licata et al. 2004)) or eGFP control. rANOVA revealed  
15 significant day-to-day (replicate-to-replicate) variability; therefore, we normalized NLuc  
16 intensities for all NP mutants to NP-R111 for each replicate. We performed Dunnett's post-test  
17 with the normalization group NP-R111 removed (since variance and degrees of freedom of NP-  
18 R111 are both 0 after normalization) and compared each NP mutant or eGFP versus 1 to  
19 generate an adjusted p-value.

20 To determine whether heating disrupted VLPs, we expressed NLuc-VP40 and heated  
21 cell culture supernatant to 4, 22, 37.1, 43.8, 60.2, or 95 °C either before or after purifying VLPs  
22 via ultracentrifugation with n = 3 biological replicates in a repeated measures design. We  
23 normalized NLuc values for all temperatures to the 4 °C value for each replicate, log-  
24 transformed the normalized values, and fit the data to sigmoidal curves using the 'nls' function in  
25 R:

$$26 \quad \log_{10}(\text{NLuc.Norm}) \sim \text{min} + \text{max}/(1 + e^{(\text{midpt} - \text{temp})/\text{scale}}) \quad (1)$$



1 , where temperature is the independent variable, NLuc.Norm is the dependent variable, and  
2 min, max, midpt, and scale are all constants to be fitted. Additionally, we tested whether NLuc  
3 intensity differed with heating to 60.2 °C either before or after purifying VLPs with a paired t-test.

4 For the VLP35 inhibition using BRET, we expressed varying amounts of VP35 NP  
5 binding peptide in the presence of NP-NLuc and NP-HaloTag with n = 3 biological replicates for  
6 each VP35 expression level. We fit the inverse function to data using the 'nls' function in R:

$$7 \quad \text{BRET} \sim \text{scale}/(\text{VP35} + \text{max}) + \text{min} \quad (2)$$

8 , where VP35 expression is the independent variable, BRET is the dependent variable, and  
9 scale, max, and min are constants to be fitted. In the non-linear regression, scale =  $1.9 \times 10^5$ ,  
10 max =  $3.4 \times 10^4$ , and min = 0.49, leading to the model:

$$11 \quad \text{BRET} \sim 1.88 \times 10^5/(\text{VP35} + 3.53 \times 10^4) + 0.49 \quad (3)$$

12 This model suggests that, in the absence VP35 expression (VP35 = 0), the maximum BRET  
13 signal would be 5.80; with very high VP35 expression (VP35  $\rightarrow \infty$ ), the minimum BRET signal  
14 would be 0.49. To determine the appropriateness of the non-linear regression, we calculated the  
15 residual/total sum of squares to be 0.95, very close to the perfect regression value of 1. To  
16 calculate confidence intervals, we used the 'nlstools' package to generate 999 bootstrap  
17 pseudoreplicates, inferred parameters for each pseudoreplicate, and plotted the central 95% of  
18 values as a shaded region.

19 For donor saturation assay using BRET, we performed the BRET protocol with NLuc-  
20 and HaloTag-tagged version of NP-R111 or NP mutants or eGFP control with n = 6 biological  
21 replicates for each HaloTag expression level. We fit the data to Michaelis-Menten curves using  
22 the 'nls' function in R:

$$23 \quad \text{BRET} \sim v_{\text{max}} * \text{NP-HaloTag} / (K_m + \text{NP-HaloTag}) \quad (4)$$

24 , where the concentration of NP-HaloTag is the independent variable, BRET is the dependent  
25 variable, and  $v_{\text{max}}$  and  $K_m$  are constants to be fitted. For NP-R111 or each NP mutant or eGFP

1 control, we inferred  $v_{\max}$  and  $K_m$  and generated 95% confidence intervals using 'nlstools' as  
2 described above. Data points from eGFP and NP- $\Delta$ OD controls failed to generate appropriate  
3 curve fits. To determine whether the remaining curve fits were significantly different from each  
4 other, we performed ANOVA with Dunnett's post-test in which NP-R111C, NP-R111E, and NP-  
5 K109E/K110E/R111E were compared to NP-R111 to generate an adjusted p-value using Prism  
6 7.

## 8 **Acknowledgements**

9 We thank Ross Tomaino of the Harvard Taplin Mass Spectrometry Facility for sample and  
10 instrument handling following immunoprecipitation of NP-containing protein complexes. We  
11 thank Gregory Hendricks of the University of Massachusetts Medical School Core Electron  
12 Microscopy Facility for sample and instrument handling following production of Ebola virion-like  
13 particles. Electron Microscopy (EM) was supported by Award Number S10RR027897 from the  
14 National Center for Research Resources to the University of Massachusetts Medical School  
15 Core EM Facility. Ebola virus phylogenetics was made possible by the Virus Pathogen  
16 Database and Analysis Resource (ViPR) (Pickett et al. 2012), which has been wholly funded  
17 with federal funds from NIAID, the US National Institutes of Health, and the US Department of  
18 Health and Human Services (DHSS), under Contract No. HHSN272201400028C. The authors  
19 are solely the responsibility for the content of this paper and do not necessarily represent the  
20 official views of the the National Center for Research Resources or of US DHHS or of the  
21 institutions and companies affiliated with the authors.

22

## 23 **Additional information**

24

## 1 Funding

| <b>Funder</b>                                                                                                                    | <b>Grant reference number</b> | <b>Author</b>         |
|----------------------------------------------------------------------------------------------------------------------------------|-------------------------------|-----------------------|
| National Science Foundation                                                                                                      | DGE 1144152                   | Aaron E Lin           |
| National Institute of Allergy and Infectious Diseases (NIAID)                                                                    | HHSN272200700016I             | Yingyun Cai           |
| NIAID                                                                                                                            | HHSN272200700016I             | Courtney Finch        |
| National Institute of General Medical Sciences                                                                                   | T32GM007753                   | Chidiebere Akusobi    |
| NIAID                                                                                                                            | R01AI118016                   | Erica Ollmann Saphire |
| Pew Charitable Trusts                                                                                                            | Pew Biomedical Scholar        | Kristian G Andersen   |
| National Center for Advancing Translational Studies Clinical and Translational Science                                           | UL1TR001114                   | Kristian G Andersen   |
| NIAID                                                                                                                            | HHSN272201400048C             | Kristian G Andersen   |
| NIAID                                                                                                                            | HHSN272200700016I             | Jens H Kuhn           |
| National Institute on Drug Abuse                                                                                                 | DP1DA034990                   | Jeremy Luban          |
| NIAID                                                                                                                            | R01AI111809                   | Jeremy Luban          |
| NIAID                                                                                                                            | U19AI110818                   | Pardis C Sabeti       |
| Howard Hughes Medical Institute                                                                                                  | Investigator Award            | Pardis C Sabeti       |
| The funders had no role in study design, data collection and interpretation, or the decision to submit the work for publication. |                               |                       |

2

## 3 Author contributions

4 Aaron E Lin, Conceptualization, Methodology, Formal analysis, Investigation, Data curation,  
5 Visualization, Writing—original draft, Writing—review & editing; William E Diehl,  
6 Conceptualization, Methodology, Validation, Formal analysis, Investigation, Visualization,  
7 Writing—original draft, Writing—review & editing; Yingyun Cai, Methodology, Validation,

1 Investigation, Writing—review & editing; Courtney Finch, Methodology, Validation, Investigation,  
2 Writing—review & editing; Chidiebere Akusobi, Methodology, Investigation, Writing—review &  
3 editing; Robert N Kirchdoerfer, Methodology, Validation, Formal analysis, Investigation,  
4 Writing—review & editing; Laura Bollinger, Visualization, Writing—review & editing; Stephen F  
5 Schaffner, Visualization, Writing—original draft, Writing—review & editing; Elizabeth A Brown,  
6 Writing—original draft, Writing—review & editing; Erica Ollmann Saphire, Writing—review &  
7 editing, Supervision; Kristian G Andersen, Software, Formal analysis, Writing—original draft,  
8 Writing—review & editing, Supervision; Jens H Kuhn, Methodology, Writing—review & editing,  
9 Supervision; Jeremy Luban, Conceptualization, Methodology, Writing—original draft, Writing—  
10 review & editing, Supervision, Project administration; Pardis C Sabeti, Conceptualization,  
11 Writing—original draft, Writing—review & editing, Supervision, Project administration

12

### 13 **Author ORCIDs**

14 Aaron E Lin, <https://orcid.org/0000-0001-7400-4125>

15 William E Diehl, <https://orcid.org/0000-0001-7943-1214>

16 Yingyun Cai, <https://orcid.org/0000-0002-1101-0920>

17 Courtney Finch, <https://orcid.org/0000-0002-3674-3282>

18 Chidiebere Akusobi, <https://orcid.org/0000-0002-1611-0015>

19 Laura Bollinger, <https://orcid.org/0000-0002-6676-8894>

20 Stephen F Schaffner, <https://orcid.org/0000-0001-6699-3568>

21 Erica Ollmann Saphire, <https://orcid.org/0000-0002-1206-7451>

22 Kristian G Andersen, <https://orcid.org/0000-0001-6431-5982>

23 Jens H Kuhn, <https://orcid.org/0000-0002-7800-6045>

24 Jeremy Luban, <https://orcid.org/0000-0001-5650-4054>

25 Pardis C Sabeti, <https://orcid.org/0000-0002-9843-1890>

1

## 2 **Additional files**

3

## 4 **Supplementary files**

- 5 • Supplementary file S1. List of all proteins identified by co-immunoprecipitation tandem mass  
6 spectrometry (co-IP-MS/MS), related to Figure 4A. We expressed V5-tagged Ebola virus  
7 NP-R111 or NP-K109E/K110E/R111E in HEK 293FT cells, and performed co-IP-MS/MS  
8 with either normal mouse IgG control or  $\alpha$ -V5 mouse IgG. We matched MS/MS  
9 fragmentation spectra to human forward protein databases and against reverse databases  
10 to a 1–2% false discovery rate using the SEQUEST database search program (Thermo  
11 Fisher) (Eng, McCormack, and Yates 1994). We computed unique and total peptide spectra  
12 matches (PSMs) for each identified protein. To generate a list of putative NP interacting  
13 partners, we filtered proteins with at least 2 unique PSMs in co-IPs of both NP-R111 and  
14 NP-K109E/K110E/R111E, and at least 2-fold greater-than-average PSM enrichment of  $\alpha$ -  
15 myc co-IP over both IgG controls combined. To eliminate abundant and ‘sticky’ proteins, we  
16 normalized average PSM enrichment against PSMs identified in all 411 Contaminant  
17 Repository for Affinity Purification (CRAPome) version 1.1 experiments (Mellacheruvu et al.  
18 2013), a collection of proteins identified in negative control isolations . From each replicate,  
19 we used the top 10% proteins enriched versus CRAPome experiments for Search Tool for  
20 the Retrieval of Interacting Genes/proteins (STRING) version 10 analysis (Snel 2000;  
21 Szklarczyk et al. 2015) and visualized interactions with Cytoscape (Shannon et al. 2003).
- 22 • Transparent reporting form

23

## 24 **Data availability**

25

- 1 All data generated or analyzed during this study are included in the manuscript and supporting
- 2 files.

## 1 References

- 2 Albariño, César G., Lisa Wiggleton Guerrero, Michael K. Lo, Stuart T. Nichol, and Jonathan S.  
3 Towner. 2015. "Development of a Reverse Genetics System to Generate a Recombinant  
4 Ebola Virus Makona Expressing a Green Fluorescent Protein." *Virology* 484: 259–64.
- 5 Baize, Sylvain, Delphine Pannetier, Lisa Oestereich, Toni Rieger, Lamine Koivogui, N'faly  
6 Magassouba, Barrè Soropogui, et al. 2014. "Emergence of Zaire Ebola Virus Disease in  
7 Guinea." *The New England Journal of Medicine* 371 (15): 1418–25.
- 8 Basler, Christopher F. 2017. "West African Ebola Virus Strains: Unstable and Ready to Invade?"  
9 *Cell Host & Microbe* 21 (3): 316–18.
- 10 Baty, Florent, Christian Ritz, Sandrine Charles, Martin Brutsche, Jean-Pierre Flandrois, and  
11 Marie-Laure Delignette-Muller. 2015. "A Toolbox for Nonlinear Regression in R: The  
12 Package Nlstools." *Journal of Statistical Software* 66 (5).  
13 <https://doi.org/10.18637/jss.v066.i05>.
- 14 Bornholdt, Zachary A., Takeshi Noda, Dafna M. Abelson, Peter Halfmann, Malcolm R. Wood,  
15 Yoshihiro Kawaoka, and Erica Ollmann Saphire. 2013. "Structural Rearrangement of Ebola  
16 Virus VP40 Begets Multiple Functions in the Virus Life Cycle." *Cell* 154 (4): 763–74.
- 17 Camus, Grégory, Carolina Segura-Morales, Dorothee Molle, Sandra Lopez-Vergès, Christina  
18 Begon-Pescia, Chantal Cazevaille, Peter Schu, Edouard Bertrand, Clarisse Berlioz-  
19 Torrent, and Eugenia Basyuk. 2007. "The Clathrin Adaptor Complex AP-1 Binds HIV-1 and  
20 MLV Gag and Facilitates Their Budding." *Molecular Biology of the Cell* 18 (8): 3193–3203.
- 21 Capella-Gutiérrez, Salvador, José M. Silla-Martínez, and Toni Gabaldón. 2009. "trimAl: A Tool  
22 for Automated Alignment Trimming in Large-Scale Phylogenetic Analyses." *Bioinformatics*  
23 25 (15): 1972–73.
- 24 Carroll, Miles W., David A. Matthews, Julian A. Hiscox, Michael J. Elmore, Georgios Pollakis,  
25 Andrew Rambaut, Roger Hewson, et al. 2015. "Temporal and Spatial Analysis of the 2014-  
26 2015 Ebola Virus Outbreak in West Africa." *Nature* 524 (7563): 97–101.
- 27 Cauldwell, Anna V., Jason S. Long, Olivier Moncorgé, and Wendy S. Barclay. 2014. "Viral  
28 Determinants of Influenza A Virus Host Range." *The Journal of General Virology* 95 (Pt 6):  
29 1193–1210.
- 30 Diehl, William E., Aaron E. Lin, Nathan D. Grubaugh, Luiz Max Carvalho, Kyusik Kim, Pyae  
31 Phyo Kyawe, Sean M. McCauley, et al. 2016. "Ebola Virus Glycoprotein with Increased  
32 Infectivity Dominated the 2013-2016 Epidemic." *Cell* 167 (4): 1088–98.e6.
- 33 Dietzel, Erik, Gordian Schudt, Verena Krähling, Mikhail Matrosovich, and Stephan Becker.  
34 2017. "Functional Characterization of Adaptive Mutations during the West African Ebola  
35 Virus Outbreak." *Journal of Virology* 91 (2). <https://doi.org/10.1128/JVI.01913-16>.
- 36 Dong, Shishang, Peng Yang, Guobang Li, Baocheng Liu, Wenming Wang, Xiang Liu, Boran  
37 Xia, et al. 2015. "Insight into the Ebola Virus Nucleocapsid Assembly Mechanism: Crystal  
38 Structure of Ebola Virus Nucleoprotein Core Domain at 1.8 Å Resolution." *Protein & Cell* 6  
39 (5): 351–62.
- 40 Eng, J. K., A. L. McCormack, and J. R. Yates. 1994. "An Approach to Correlate Tandem Mass  
41 Spectral Data of Peptides with Amino Acid Sequences in a Protein Database." *Journal of*  
42 *the American Society for Mass Spectrometry* 5 (11): 976–89.
- 43 Gao, Guangping, and Gregory M. Hendricks. 2012. "Introducing Genes into Mammalian Cells:  
44 Viral Vectors. Protocol 14: Analysis of rAAV Sample Morphology Using Negative Staining  
45 and High Resolution Electron Microscopy." In *Molecular Cloning (A Laboratory Manual)*,  
46 edited by Michael R. Green and Joseph Sambrook, 2:1301–3. Cold Spring Harbor Press.
- 47 García-Dorival, Isabel, Weining Wu, Stuart D. Armstrong, John N. Barr, Miles W. Carroll, Roger  
48 Hewson, and Julian A. Hiscox. 2016. "Elucidation of the Cellular Interactome of Ebola Virus



- 1 Nucleoprotein and Identification of Therapeutic Targets.” *Journal of Proteome Research* 15  
2 (12): 4290–4303.
- 3 Gibson, Daniel G., Lei Young, Ray-Yuan Chuang, J. Craig Venter, Clyde A. Hutchison 3rd, and  
4 Hamilton O. Smith. 2009. “Enzymatic Assembly of DNA Molecules up to Several Hundred  
5 Kilobases.” *Nature Methods* 6 (5): 343–45.
- 6 Gire, Stephen K., Augustine Goba, Kristian G. Andersen, Rachel S. G. Sealfon, Daniel J. Park,  
7 Lansana Kanneh, Simbirie Jalloh, et al. 2014. “Genomic Surveillance Elucidates Ebola  
8 Virus Origin and Transmission during the 2014 Outbreak.” *Science* 345 (6202): 1369–72.
- 9 Goldstein, Tracey, Simon J. Anthony, Aiah Gbakima, Brian H. Bird, James Bangura, Alexandre  
10 Tremeau-Bravard, Manjunatha N. Belaganahalli, et al. 2018. “The Discovery of Bombali  
11 Virus Adds Further Support for Bats as Hosts of Ebolaviruses.” *Nature Microbiology*.  
12 <https://doi.org/10.1038/s41564-018-0227-2>.
- 13 Groseth, A., J. E. Charton, M. Sauerborn, F. Feldmann, S. M. Jones, T. Hoenen, and H.  
14 Feldmann. 2009. “The Ebola Virus Ribonucleoprotein Complex: A Novel VP30–L  
15 Interaction Identified.” *Virus Research* 140 (1-2): 8–14.
- 16 Hall, Mary P., James Unch, Brock F. Binkowski, Michael P. Valley, Braeden L. Butler, Monika G.  
17 Wood, Paul Otto, et al. 2012. “Engineered Luciferase Reporter from a Deep Sea Shrimp  
18 Utilizing a Novel Imidazopyrazinone Substrate.” *ACS Chemical Biology* 7 (11): 1848–57.
- 19 Harty, R. N., M. E. Brown, G. Wang, J. Huijbregtse, and F. P. Hayes. 2000. “A PPxY Motif within  
20 the VP40 Protein of Ebola Virus Interacts Physically and Functionally with a Ubiquitin  
21 Ligase: Implications for Filovirus Budding.” *Proceedings of the National Academy of  
22 Sciences of the United States of America* 97 (25): 13871–76.
- 23 Hoenen, Thomas, Allison Groseth, Julie Callison, Ayato Takada, and Heinz Feldmann. 2013. “A  
24 Novel Ebola Virus Expressing Luciferase Allows for Rapid and Quantitative Testing of  
25 Antivirals.” *Antiviral Research* 99 (3): 207–13.
- 26 Hoenen, Thomas, Allison Groseth, Kyle Rosenke, Robert J. Fischer, Andreas Hoenen, Seth D.  
27 Judson, Cynthia Martellaro, et al. 2016. “Nanopore Sequencing as a Rapidly Deployable  
28 Ebola Outbreak Tool.” *Emerging Infectious Diseases* 22 (2): 331–34.
- 29 Hoenen, T., S. Jung, A. Herwig, A. Groseth, and S. Becker. 2010. “Both Matrix Proteins of  
30 Ebola Virus Contribute to the Regulation of Viral Genome Replication and Transcription.”  
31 *Virology* 403 (1): 56–66.
- 32 Hoenen, T., D. Safronetz, A. Groseth, K. R. Wollenberg, O. A. Koita, B. Diarra, I. S. Fall, et al.  
33 2015. “Virology. Mutation Rate and Genotype Variation of Ebola Virus from Mali Case  
34 Sequences.” *Science* 348 (6230): 117–19.
- 35 Hoffmann, Markus, Lisa Crone, Erik Dietzel, Jennifer Paijo, Mariana González-Hernández, Inga  
36 Nehlmeier, Ulrich Kalinke, Stephan Becker, and Stefan Pöhlmann. 2017. “A Polymorphism  
37 within the Internal Fusion Loop of the Ebola Virus Glycoprotein Modulates Host Cell Entry.”  
38 *Journal of Virology* 91 (9). <https://doi.org/10.1128/JVI.00177-17>.
- 39 Holmes, Edward C. 2009. *The Evolution and Emergence of RNA Viruses*. Oxford University  
40 Press.
- 41 Hu, Lei, Jared M. Trefethen, Yuhong Zeng, Luisa Yee, Satoshi Ohtake, David Lechuga-  
42 Ballesteros, Kelly L. Warfield, et al. 2011. “Biophysical Characterization and Conformational  
43 Stability of Ebola and Marburg Virus-like Particles.” *Journal of Pharmaceutical Sciences*  
44 100 (12): 5156–73.
- 45 Jasenosky, L. D., G. Neumann, I. Lukashevich, and Y. Kawaoka. 2001. “Ebola Virus VP40-  
46 Induced Particle Formation and Association with the Lipid Bilayer.” *Journal of Virology* 75  
47 (11): 5205–14.
- 48 Jasenosky, Luke D., and Yoshihiro Kawaoka. 2004. “Filovirus Budding.” *Virus Research* 106  
49 (2): 181–88.
- 50 Jasenosky, Luke D., Gabriele Neumann, and Yoshihiro Kawaoka. 2010. “Minigenome-Based  
51 Reporter System Suitable for High-Throughput Screening of Compounds Able to Inhibit



- 1 Ebolavirus Replication And/or Transcription.” *Antimicrobial Agents and Chemotherapy* 54  
2 (7): 3007–10.
- 3 Katoh, Kazutaka, and Daron M. Standley. 2013. “MAFFT Multiple Sequence Alignment  
4 Software Version 7: Improvements in Performance and Usability.” *Molecular Biology and  
5 Evolution* 30 (4): 772–80.
- 6 Kim, Jin Hee, Sang-Rok Lee, Li-Hua Li, Hye-Jeong Park, Jeong-Hoh Park, Kwang Youl Lee,  
7 Myeong-Kyu Kim, Boo Ahn Shin, and Seok-Yong Choi. 2011. “High Cleavage Efficiency of  
8 a 2A Peptide Derived from Porcine Teschovirus-1 in Human Cell Lines, Zebrafish and  
9 Mice.” *PloS One* 6 (4): e18556.
- 10 Kirchdoerfer, Robert N., Dafna M. Abelson, Sheng Li, Malcolm R. Wood, and Erica Ollmann  
11 Sapphire. 2015. “Assembly of the Ebola Virus Nucleoprotein from a Chaperoned VP35  
12 Complex.” *Cell Reports* 12 (1): 140–49.
- 13 Kirchdoerfer, Robert N., Crystal L. Moyer, Dafna M. Abelson, and Erica Ollmann Sapphire. 2016.  
14 “The Ebola Virus VP30-NP Interaction Is a Regulator of Viral RNA Synthesis.” *PLoS  
15 Pathogens* 12 (10): e1005937.
- 16 Kirmaier, Andrea, Fan Wu, Ruchi M. Newman, Laura R. Hall, Jennifer S. Morgan, Shelby  
17 O’Connor, Preston A. Marx, et al. 2010. “TRIM5 Suppresses Cross-Species Transmission  
18 of a Primate Immunodeficiency Virus and Selects for Emergence of Resistant Variants in  
19 the New Species.” *PLoS Biology* 8 (8). <https://doi.org/10.1371/journal.pbio.1000462>.
- 20 Krupp, Annabel, Kevin R. McCarthy, Marcel Ooms, Michael Letko, Jennifer S. Morgan, Viviana  
21 Simon, and Welkin E. Johnson. 2013. “APOBEC3G Polymorphism as a Selective Barrier to  
22 Cross-Species Transmission and Emergence of Pathogenic SIV and AIDS in a Primate  
23 Host.” *PLoS Pathogens* 9 (10): e1003641.
- 24 Kugelman, Jeffrey R., Mariano Sanchez-Lockhart, Kristian G. Andersen, Stephen Gire, Daniel J.  
25 Park, Rachel Sealfon, Aaron E. Lin, et al. 2015. “Evaluation of the Potential Impact of Ebola  
26 Virus Genomic Drift on the Efficacy of Sequence-Based Candidate Therapeutics.” *mBio* 6  
27 (1). <https://doi.org/10.1128/mBio.02227-14>.
- 28 Ladner, Jason T., Michael R. Wiley, Suzanne Mate, Gytis Dudas, Karla Prieto, Sean Lovett,  
29 Elyse R. Nagle, et al. 2015. “Evolution and Spread of Ebola Virus in Liberia, 2014-2015.”  
30 *Cell Host & Microbe* 18 (6): 659–69.
- 31 Leung, Daisy W., Dominika Borek, Priya Luthra, Jennifer M. Binning, Manu Anantpadma, Gai  
32 Liu, Ian B. Harvey, et al. 2015. “An Intrinsically Disordered Peptide from Ebola Virus VP35  
33 Controls Viral RNA Synthesis by Modulating Nucleoprotein-RNA Interactions.” *Cell Reports*  
34 11 (3): 376–89.
- 35 Licata, Jillian M., Reed F. Johnson, Ziyang Han, and Ronald N. Harty. 2004. “Contribution of  
36 Ebola Virus Glycoprotein, Nucleoprotein, and VP24 to Budding of VP40 Virus-like  
37 Particles.” *Journal of Virology* 78 (14): 7344–51.
- 38 Lin, Aaron E., Todd M. Greco, Katinka Döhner, Beate Sodeik, and Ileana M. Cristea. 2013. “A  
39 Proteomic Perspective of Inbuilt Viral Protein Regulation: pUL46 Tegument Protein Is  
40 Targeted for Degradation by ICP0 during Herpes Simplex Virus Type 1 Infection.”  
41 *Molecular & Cellular Proteomics: MCP* 12 (11): 3237–52.
- 42 Liu, Yuliang, Luis Cocka, Atsushi Okumura, Yong-An Zhang, J. Oriol Sunyer, and Ronald N.  
43 Harty. 2010. “Conserved Motifs within Ebola and Marburg Virus VP40 Proteins Are  
44 Important for Stability, Localization, and Subsequent Budding of Virus-like Particles.”  
45 *Journal of Virology* 84 (5): 2294–2303.
- 46 Machleidt, Thomas, Carolyn C. Woodroffe, Marie K. Schwinn, Jacqui Méndez, Matthew B.  
47 Robers, Kris Zimmerman, Paul Otto, Danette L. Daniels, Thomas A. Kirkland, and Keith V.  
48 Wood. 2015. “NanoBRET--A Novel BRET Platform for the Analysis of Protein-Protein  
49 Interactions.” *ACS Chemical Biology* 10 (8): 1797–1804.
- 50 Manicassamy, Balaji, and Lijun Rong. 2009. “Expression of Ebolavirus Glycoprotein on the  
51 Target Cells Enhances Viral Entry.” *Virology Journal* 6 (June): 75.

- 1 Marzi, Andrea, Spencer Chadinah, Elaine Haddock, Friederike Feldmann, Nicolette Arndt,  
2 Cynthia Martellaro, Dana P. Scott, et al. 2018. "Recently Identified Mutations in the Ebola  
3 Virus-Makona Genome Do Not Alter Pathogenicity in Animal Models." *Cell Reports* 23 (6):  
4 1806–16.
- 5 McCarthy, Sarah E., Jillian M. Licata, and Ronald N. Harty. 2006. "A Luciferase-Based Budding  
6 Assay for Ebola Virus." *Journal of Virological Methods* 137 (1): 115–19.
- 7 Mellacheruvu, Dattatreya, Zachary Wright, Amber L. Couzens, Jean-Philippe Lambert, Nicole A.  
8 St-Denis, Tuo Li, Yana V. Miteva, et al. 2013. "The CRAPome: A Contaminant Repository  
9 for Affinity Purification-Mass Spectrometry Data." *Nature Methods* 10 (8): 730–36.
- 10 Nelson, David L., Albert L. Lehninger, and Michael M. Cox. 2008. *Lehninger Principles of*  
11 *Biochemistry*. Macmillan.
- 12 Neumann, G., H. Feldmann, S. Watanabe, I. Lukashevich, and Y. Kawaoka. 2002. "Reverse  
13 Genetics Demonstrates That Proteolytic Processing of the Ebola Virus Glycoprotein Is Not  
14 Essential for Replication in Cell Culture." *Journal of Virology* 76 (1): 406–10.
- 15 Ng, Andy Ka-Leung, Mandy Ka-Han Lam, Hongmin Zhang, Jinhuan Liu, Shannon Wing-Ngor  
16 Au, Paul Kay-Sheung Chan, Jiahuai Wang, and Pang-Chui Shaw. 2012. "Structural Basis  
17 for RNA Binding and Homo-Oligomer Formation by Influenza B Virus Nucleoprotein."  
18 *Journal of Virology* 86 (12): 6758–67.
- 19 Noda, Takeshi, Hiroshi Sagara, Emiko Suzuki, Ayato Takada, Hiroshi Kida, and Yoshihiro  
20 Kawaoka. 2002. "Ebola Virus VP40 Drives the Formation of Virus-like Filamentous Particles  
21 along with GP." *Journal of Virology* 76 (10): 4855–65.
- 22 Ortiz-Riano, E., B. Y. H. Cheng, J. C. de la Torre, and L. Martinez-Sobrido. 2012. "Self-  
23 Association of Lymphocytic Choriomeningitis Virus Nucleoprotein Is Mediated by Its N-  
24 Terminal Region and Is Not Required for Its Anti-Interferon Function." *Journal of Virology*  
25 86 (6): 3307–17.
- 26 Park, Daniel J., Gytis Dudas, Shirlee Wohl, Augustine Goba, Shannon L. M. Whitmer, Kristian  
27 G. Andersen, Rachel S. Sealfon, et al. 2015. "Ebola Virus Epidemiology, Transmission, and  
28 Evolution during Seven Months in Sierra Leone." *Cell* 161 (7): 1516–26.
- 29 Peng, J., and S. P. Gygi. 2001. "Proteomics: The Move to Mixtures." *Journal of Mass*  
30 *Spectrometry: JMS* 36 (10): 1083–91.
- 31 Pickett, Brett E., Eva L. Sadat, Yun Zhang, Jyothi M. Noronha, R. Burke Squires, Victoria Hunt,  
32 Mengya Liu, et al. 2012. "ViPR: An Open Bioinformatics Database and Analysis Resource  
33 for Virology Research." *Nucleic Acids Research* 40 (Database issue): D593–98.
- 34 Pleet, Michelle L., Allison Mathiesen, Catherine DeMarino, Yao A. Akpamagbo, Robert A.  
35 Barclay, Angela Schwab, Sergey Iordanskiy, et al. 2016. "Ebola VP40 in Exosomes Can  
36 Cause Immune Cell Dysfunction." *Frontiers in Microbiology* 7 (November): 1765.
- 37 Quick, Joshua, Nicholas J. Loman, Sophie Duraffour, Jared T. Simpson, Ettore Severi, Lauren  
38 Cowley, Joseph Akoi Bore, et al. 2016. "Real-Time, Portable Genome Sequencing for  
39 Ebola Surveillance." *Nature* 530 (7589): 228–32.
- 40 R Core Team. 2016. "R: A Language and Environment for Statistical Computing." *R Foundation*  
41 *for Statistical Computing, Vienna, Austria*. <https://www.R-project.org/>.
- 42 Schneider, Caroline A., Wayne S. Rasband, and Kevin W. Eliceiri. 2012. "NIH Image to ImageJ:  
43 25 Years of Image Analysis." *Nature Methods* 9 (7): 671–75.
- 44 Schrödinger, LLC. 2015. "The PyMOL Molecular Graphics System, Version 1.8."
- 45 Shannon, Paul, Andrew Markiel, Owen Ozier, Nitin S. Baliga, Jonathan T. Wang, Daniel  
46 Ramage, Nada Amin, Benno Schwikowski, and Trey Ideker. 2003. "Cytoscape: A Software  
47 Environment for Integrated Models of Biomolecular Interaction Networks." *Genome*  
48 *Research* 13 (11): 2498–2504.
- 49 Shevchenko, A., M. Wilm, O. Vorm, and M. Mann. 1996. "Mass Spectrometric Sequencing of  
50 Proteins Silver-Stained Polyacrylamide Gels." *Analytical Chemistry* 68 (5): 850–58.
- 51 Simon-Loriere, Etienne, Ousmane Faye, Oumar Faye, Lamine Koivogui, Nfaly Magassouba,

- 1 Sakoba Keita, Jean-Michel Thiberge, et al. 2015. "Distinct Lineages of Ebola Virus in  
2 Guinea during the 2014 West African Epidemic." *Nature* 524 (7563): 102–4.
- 3 Smits, Saskia L., Suzan D. Pas, Chantal B. Reusken, Bart L. Haagmans, Peirro Pertile, Corrado  
4 Cancedda, Kerry Dierberg, et al. 2015. "Genotypic Anomaly in Ebola Virus Strains  
5 Circulating in Magazine Wharf Area, Freetown, Sierra Leone, 2015." *Euro Surveillance:  
6 Bulletin European Sur Les Maladies Transmissibles = European Communicable Disease  
7 Bulletin* 20 (40). <https://doi.org/10.2807/1560-7917.ES.2015.20.40.30035>.
- 8 Snel, B. 2000. "STRING: A Web-Server to Retrieve and Display the Repeatedly Occurring  
9 Neighbourhood of a Gene." *Nucleic Acids Research* 28 (18): 3442–44.
- 10 Stamatakis, A., T. Ludwig, and H. Meier. 2005. "RAxML-III: A Fast Program for Maximum  
11 Likelihood-Based Inference of Large Phylogenetic Trees." *Bioinformatics* 21 (4): 456–63.
- 12 Subach, Oksana M., Paula J. Cranfill, Michael W. Davidson, and Vladislav V. Verkhusha. 2011.  
13 "An Enhanced Monomeric Blue Fluorescent Protein with the High Chemical Stability of the  
14 Chromophore." *PLoS One* 6 (12): e28674.
- 15 Sugita, Yukihiko, Hideyuki Matsunami, Yoshihiro Kawaoka, Takeshi Noda, and Matthias Wolf.  
16 2018. "Cryo-EM Structure of the Ebola Virus nucleoprotein–RNA Complex at 3.6 Å  
17 Resolution." *Nature*, October. <https://doi.org/10.1038/s41586-018-0630-0>.
- 18 Su, Zhaoming, Chao Wu, Liuqing Shi, Priya Luthra, Grigore D. Pintilie, Britney Johnson, Justin  
19 R. Porter, et al. 2018. "Electron Cryo-Microscopy Structure of Ebola Virus Nucleoprotein  
20 Reveals a Mechanism for Nucleocapsid-like Assembly." *Cell* 172 (5): 966–78.e12.
- 21 Szklarczyk, Damian, Andrea Franceschini, Stefan Wyder, Kristoffer Forslund, Davide Heller,  
22 Jaime Huerta-Cepas, Milan Simonovic, et al. 2015. "STRING v10: Protein-Protein  
23 Interaction Networks, Integrated over the Tree of Life." *Nucleic Acids Research* 43  
24 (Database issue): D447–52.
- 25 Tong, Yi-Gang, Wei-Feng Shi, Di Liu, Jun Qian, Long Liang, Xiao-Chen Bo, Jun Liu, et al. 2015.  
26 "Genetic Diversity and Evolutionary Dynamics of Ebola Virus in Sierra Leone." *Nature* 524  
27 (7563): 93–96.
- 28 Towner, Jonathan S., Jason Paragas, Jason E. Dover, Manisha Gupta, Cynthia S. Goldsmith,  
29 John W. Huggins, and Stuart T. Nichol. 2005. "Generation of eGFP Expressing  
30 Recombinant Zaire Ebolavirus for Analysis of Early Pathogenesis Events and High-  
31 Throughput Antiviral Drug Screening." *Virology* 332 (1): 20–27.
- 32 Tsetsarkin, Konstantin A., Dana L. Vanlandingham, Charles E. McGee, and Stephen Higgs.  
33 2007. "A Single Mutation in Chikungunya Virus Affects Vector Specificity and Epidemic  
34 Potential." *PLoS Pathogens* 3 (12): e201.
- 35 Ueda, Mahoko Takahashi, Yohei Kurosaki, Taisuke Izumi, Yusuke Nakano, Olamide K.  
36 Oloniniyi, Jiro Yasuda, Yoshio Koyanagi, Kei Sato, and So Nakagawa. 2017. "Functional  
37 Mutations in Spike Glycoprotein of Zaire Ebolavirus Associated with an Increase in Infection  
38 Efficiency." *Genes to Cells: Devoted to Molecular & Cellular Mechanisms* 22 (2): 148–59.
- 39 Urbanowicz, Richard A., C. Patrick McClure, Anavaj Sakuntabhai, Amadou A. Sall, Gary  
40 Kobinger, Marcel A. Müller, Edward C. Holmes, Félix A. Rey, Etienne Simon-Loriere, and  
41 Jonathan K. Ball. 2016. "Human Adaptation of Ebola Virus during the West African  
42 Outbreak." *Cell* 167 (4): 1079–87.e5.
- 43 Volchkov, V. E., V. A. Volchkova, E. Muhlberger, L. V. Kolesnikova, M. Weik, O. Dolnik, and H.  
44 D. Klenk. 2001. "Recovery of Infectious Ebola Virus from Complementary DNA: RNA  
45 Editing of the GP Gene and Viral Cytotoxicity." *Science* 291 (5510): 1965–69.
- 46 Wang, May K., Sun-Young Lim, Soo Mi Lee, and James M. Cunningham. 2017. "Biochemical  
47 Basis for Increased Activity of Ebola Glycoprotein in the 2013-16 Epidemic." *Cell Host &  
48 Microbe* 21 (3): 367–75.
- 49 Wan, William, Larissa Kolesnikova, Mairi Clarke, Alexander Koehler, Takeshi Noda, Stephan  
50 Becker, and John A. G. Briggs. 2017. "Structure and Assembly of the Ebola Virus  
51 Nucleocapsid." *Nature* 551 (7680): 394–97.

- 1 Warren, Luigi, Philip D. Manos, Tim Ahfeldt, Yui-Han Loh, Hu Li, Frank Lau, Wataru Ebina, et  
2 al. 2010. "Highly Efficient Reprogramming to Pluripotency and Directed Differentiation of  
3 Human Cells with Synthetic Modified mRNA." *Cell Stem Cell* 7 (5): 618–30.
- 4 Watanabe, Shinji, Takeshi Noda, and Yoshihiro Kawaoka. 2006. "Functional Mapping of the  
5 Nucleoprotein of Ebola Virus." *Journal of Virology* 80 (8): 3743–51.
- 6 WHO. 2016. "Ebola Situation Report - 30 March 2016." [http://apps.who.int/ebola/current-](http://apps.who.int/ebola/current-situation/ebola-situation-report-30-march-2016)  
7 [situation/ebola-situation-report-30-march-2016](http://apps.who.int/ebola/current-situation/ebola-situation-report-30-march-2016).
- 8 Wickham, Hadley. 2016. *ggplot2: Elegant Graphics for Data Analysis*. Springer.
- 9 Wong, Gary, Shihua He, Anders Leung, Wenguang Cao, Yuhai Bi, Zirui Zhang, Wenjun Zhu, et  
10 al. 2018. "Naturally-Occurring Single Mutations in Ebola Observably Impact Infectivity."  
11 *Journal of Virology*, October, JVI.01098–18.
- 12 Yuan, Ling, Xing-Yao Huang, Zhong-Yu Liu, Feng Zhang, Xing-Liang Zhu, Jiu-Yang Yu, Xue Ji,  
13 et al. 2017. "A Single Mutation in the prM Protein of Zika Virus Contributes to Fetal  
14 Microcephaly." *Science* 358 (6365): 933–36.
- 15 Zimmermann, Petra, Benjamin Mänz, Otto Haller, Martin Schwemmle, and Georg Kochs. 2011.  
16 "The Viral Nucleoprotein Determines Mx Sensitivity of Influenza A Viruses." *Journal of*  
17 *Virology* 85 (16): 8133–40.

## 1 **Figure Legends**

2

### 3 **Figure 1. The Ebola virus nucleoprotein mutation R111C emerged alongside a GP-A82V** 4 **mutation and lies outside of established NP known functional domains.**

5 **(A)** Phylogenetic analysis of the 2013–2016 Ebola virus disease (EVD) epidemic. We  
6 constructed a maximum likelihood tree based on 1,823 EBOV genome sequences, and colored  
7 branches based on GP-82 and NP-111 alleles. No GP-A82/NP-R111C sequences were  
8 detected. Arrowheads point to the emergence of the GP-A82V (green) and NP-R111C (blue)  
9 mutations compared to genomes encoding the ancestral GP-A82/NP-R111 alleles (tan). The  
10 scale bar denotes substitutions/nucleotide.

11 **(B)** Number of EVD cases over time, stratified by genotype. Coloring is identical to Figure 1A.

12 **(C)** Schematic of NP. R111 (yellow) lies in an un-annotated region within the N-terminal lobe.

13 Key residues for known NP interactions are highlighted.

14 **(D)** Crystal structure (PDB #4YPI) of NP. Though the precise location of the oligomerization  
15 domain has yet to be determined by crystallography (orange dashed line), the R111 residue  
16 (yellow) is located on the same face as residues proximal to the oligomerization domain  
17 (orange), but opposite to the VP35 (magenta) and RNA (red) interaction interfaces.

18

### 19 **Figure 2. Ebola virus nucleoprotein mutation R111C increases budding of virion-like** 20 **particles.**

21 **(A)** Schematic of the virion-like particle (VLP) budding assay. We transfect plasmid encoding  
22 NLuc-VP40 to form luminescent VLPs, and co-transfect NP-expressing plasmids to measure the  
23 impact of NP genotype on VLP budding.

24 **(B)** VLP budding assay control. VP40 loss-of-function mutant L117R fails to form VLPs. n = 6



1 biological replicates.

2 **(C)** VLP budding with NP mutants. NP-R111C (red) significantly increases budding compared to  
3 wild-type NP-R111 (tan). The charge-reversal mutants NP-R111E (light blue) and NP-  
4 K109E/K110E/R111E (dark blue) do not affect VLP budding compared to NP-R111 as indicated  
5 by lack of statistical significance. p-values were calculated using Dunnett's test. n = 6 biological  
6 replicates.

7

8 **Figure 3. Ebola virus nucleoprotein residue 111 significantly affects oligomerization of**  
9 **NP.**

10 **(A)** Schematic of the NP oligomerization assay. We co-express NP fused to NLuc (donor) and  
11 HaloTag (acceptor). Binding and oligomerization brings the tags into close spatial proximity,  
12 allowing bioluminescence resonance energy transfer (BRET) and emission at 625 nm.

13 **(B)** Oligomerization assay controls. Absence of either tag, free NLuc, or deletion of the NP  
14 oligomerization domain ( $\Delta$ OD) reduces BRET signal.

15 **(C)** EBOV VP35 NP-binding peptide (NPBP) disrupts NP oligomerization. In addition to  
16 expressing NP-NLuc and NP-HaloTag, we co-expressed varying amounts of eGFP-P2A-  
17 VP35(NPBP). Data (n = 3 biological replicates) are fit to an inverse function. Shading indicates  
18 95% confidence intervals based on 999 bootstrap pseudoreplicates.

19 **(D)** Donor saturation assay with NP mutants. We expressed a constant amount of NP-NLuc  
20 donor and titrated increasing amounts of NP-HaloTag acceptor to generate saturation curves (n  
21 = 6 biological replicates). We fitted data to Michaelis-Menten kinetics and calculated maximum  
22 oligomerization (Max) and  $K_m$  for each NP mutant. NP-R111C (red), NP-R111E (light blue), and  
23 NP-K109E/K110E/R111E (dark blue) mutants significantly increased oligomerization compared  
24 to NP-R111 (tan). NP- $\Delta$ OD (gray) yielded much weaker oligomerization, and eGFP (black dots

1 near x-axis) did not produce data suitable for curve fitting. Shading indicates 95% confidence  
2 intervals based on 999 bootstrap pseudoreplicates. N = 6 biological replicates.

3

4 **Figure 4. Ebola virus nucleoprotein interacts with the AP-1 clathrin adaptor complex**  
5 **independent of the nucleoprotein residue 111 allele.**

6 **(A)** IP-MS/MS and STRING analysis of proteins co-immunoprecipitating with NP-myc, with both  
7 ancestral R111 and triple charge-reversal (EEE) NP-myc mutants.

8 **(B)** Reciprocal co-IP of NP with AP-1 and vacuolar protein sorting (VPS) antibodies. Adaptor  
9 related protein complex 1 subunit gamma 1 (AP1G1), and mu 1 (AP1M1) are strong interactors  
10 of NP, whereas VPS35 is one of several weak interactors.

11 **(C)** Reciprocal co-IP of all NP mutants and eGFP negative control with  $\alpha$ -AP1G1 antibody. No  
12 apparent difference was observed between any NP mutant or NP-R111 ancestor.

13

14 **Figure 5. Ebola virus nucleoprotein position 111 influences viral transcription and**  
15 **replication.**

16 We expressed NP mutants or ancestral NP-R111 in the presence of the EBOV replication  
17 complex (L, VP30, VP24), a minigenome (MG) encoding a firefly luciferase reporter gene, and a  
18 *Renilla* luciferase loading control. Absence of L, VP30, or minigenome abolished firefly  
19 luciferase signal. Both NP-R111E and NP-K109E/K110E/R111E charge-reversal mutants  
20 significantly decrease MG activity. p-values are calculated using Dunnett's test. n = 3 biological  
21 replicates.

22

1 **Figure S1. Additional EBOV NP structural data.**

2 (A) Electron microscopy subtomogram average (PDB #6EHL) of NP. The R111 residue (yellow)  
3 lies in  $\beta$  strand 2 ( $\beta$ -2), anti-parallel to strand  $\beta$ -1 (blue) and the oligomerization domain  
4 (orange).

5 (B) Ebolavirus sequence alignment of residues surrounding R111. We compared sequences  
6 from the National Center for Biotechnology Information RefSeq database for 6 ebolaviruses and  
7 overlaid secondary structure as in another study (Wan et al. 2017). The shaded yellow region  
8 from residues 109–111 indicates a patch of basic residues that is relatively well conserved. The  
9 oligomerization domain (orange) is nearly completely conserved. A key electrostatic NP-NP  
10 interaction between K110 on one NP monomer and E349 on a different NP monomer (Sugita et  
11 al. 2018), is also highly conserved.

12

13 **Figure S2. VLP budding assay.**

14 (A) Heating supernatant prior to ultracentrifugation results in loss of VLP luminescence signal.  
15 We expressed NLuc-VP40 in cells, collected total supernatant, and heated at a gradient of  
16 temperatures. We then either measured luminescence directly to assess NLuc thermal stability  
17 (blue), or pelleted VLPs and then measured luminescence to assess VLP stability (tan). Data ( $n$   
18 = 3 biological replicates) were normalized to 4 °C, log-transformed, and fit to sigmoidal curves.

19 (B) EM of VP40 VLPs created by with co-expression of GP-A82V and NP mutants or ancestral  
20 NP-R111.

21 (C) Quantification of VLP size and volume.

22

23 **Figure S3. BRET NP oligomerization assay.**

24 Co-immunoprecipitation (co-IP) western blot (WB) NP oligomerization assay. Deletion of NP



1 residues 20–38 ( $\Delta$ OD) eliminates oligomerization. We co-expressed myc- and V5-tagged NP or  
2 NP $\Delta$ OD, lysed cells, and performed co-IP targeting either the myc (blue) or the V5 (orange)  
3 tags, or IgG isotype controls, followed by detection of co-eluting proteins by western blot (WB).  
4 Oligomerization is indicated by heterologous detection (IP myc and WB band for V5, and vice  
5 versa) and did not occur with NP $\Delta$ OD. NP and NP $\Delta$ OD run at the same apparent molecular  
6 weight. The H and L chains of the co-IP antibody were detected by WB using a secondary  
7 antibody.

# 1 Figure 1

2

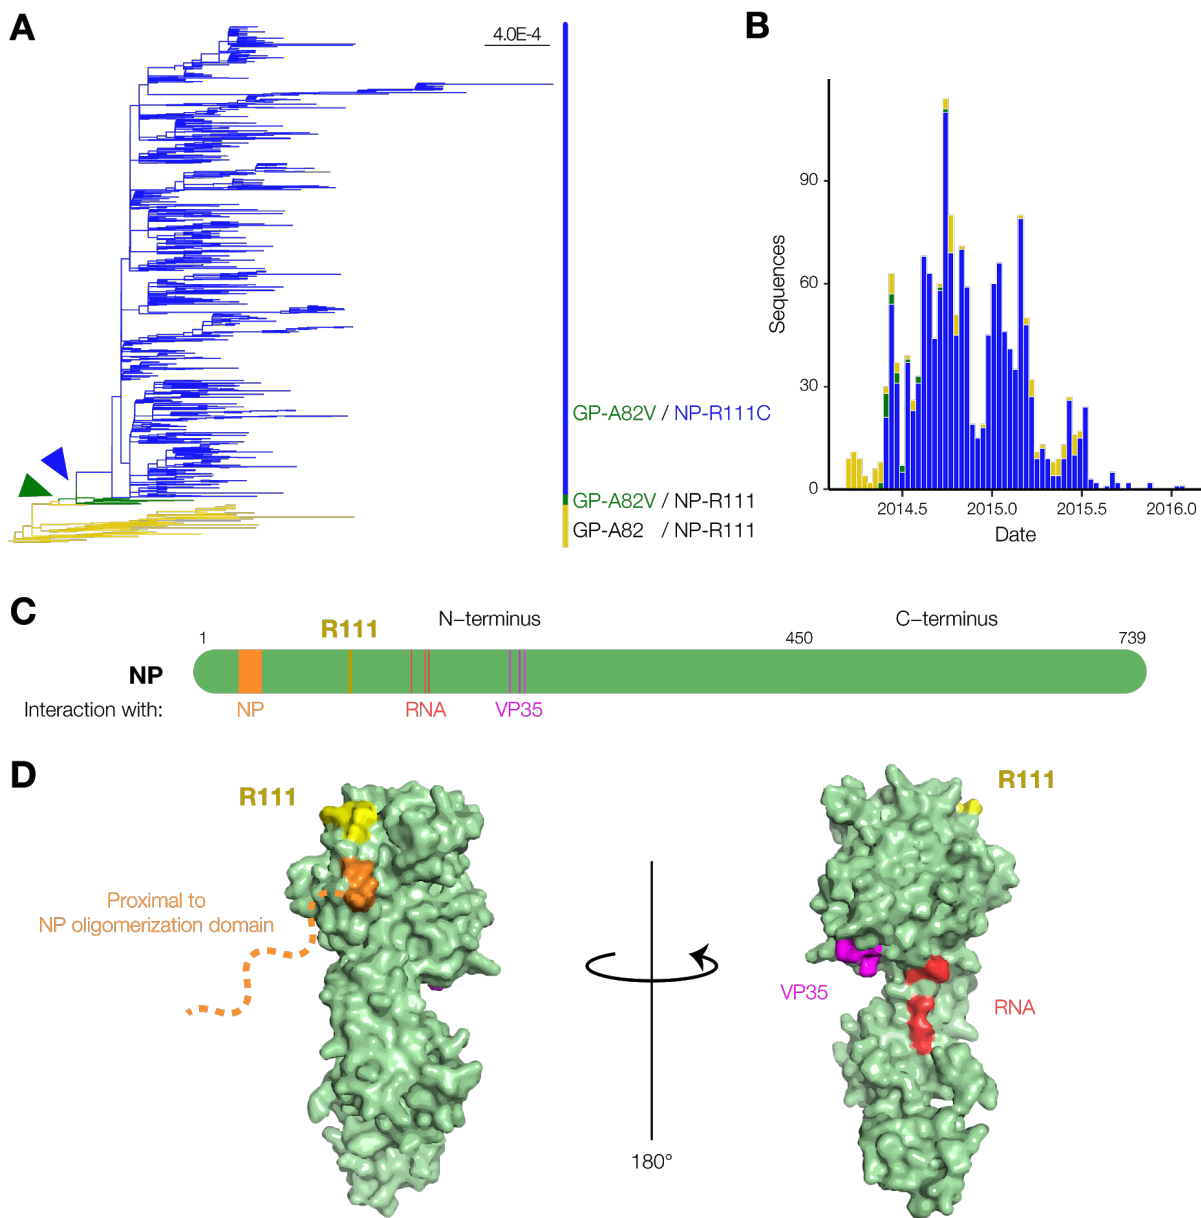

3

4

# 1 Figure 2

2

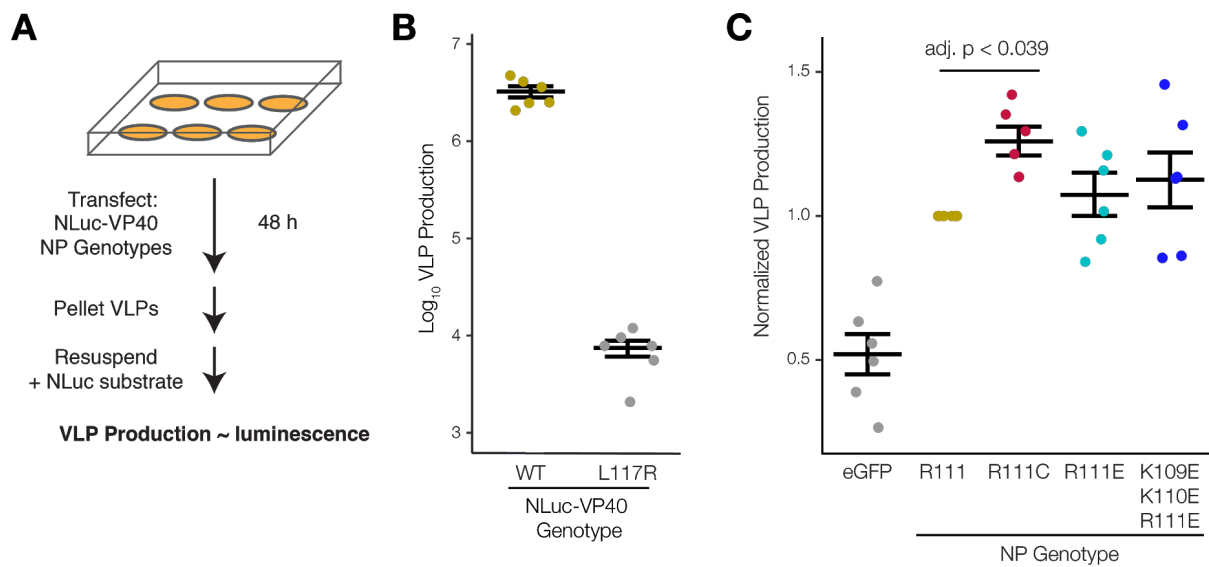

3  
4

1 **Figure 3**

2

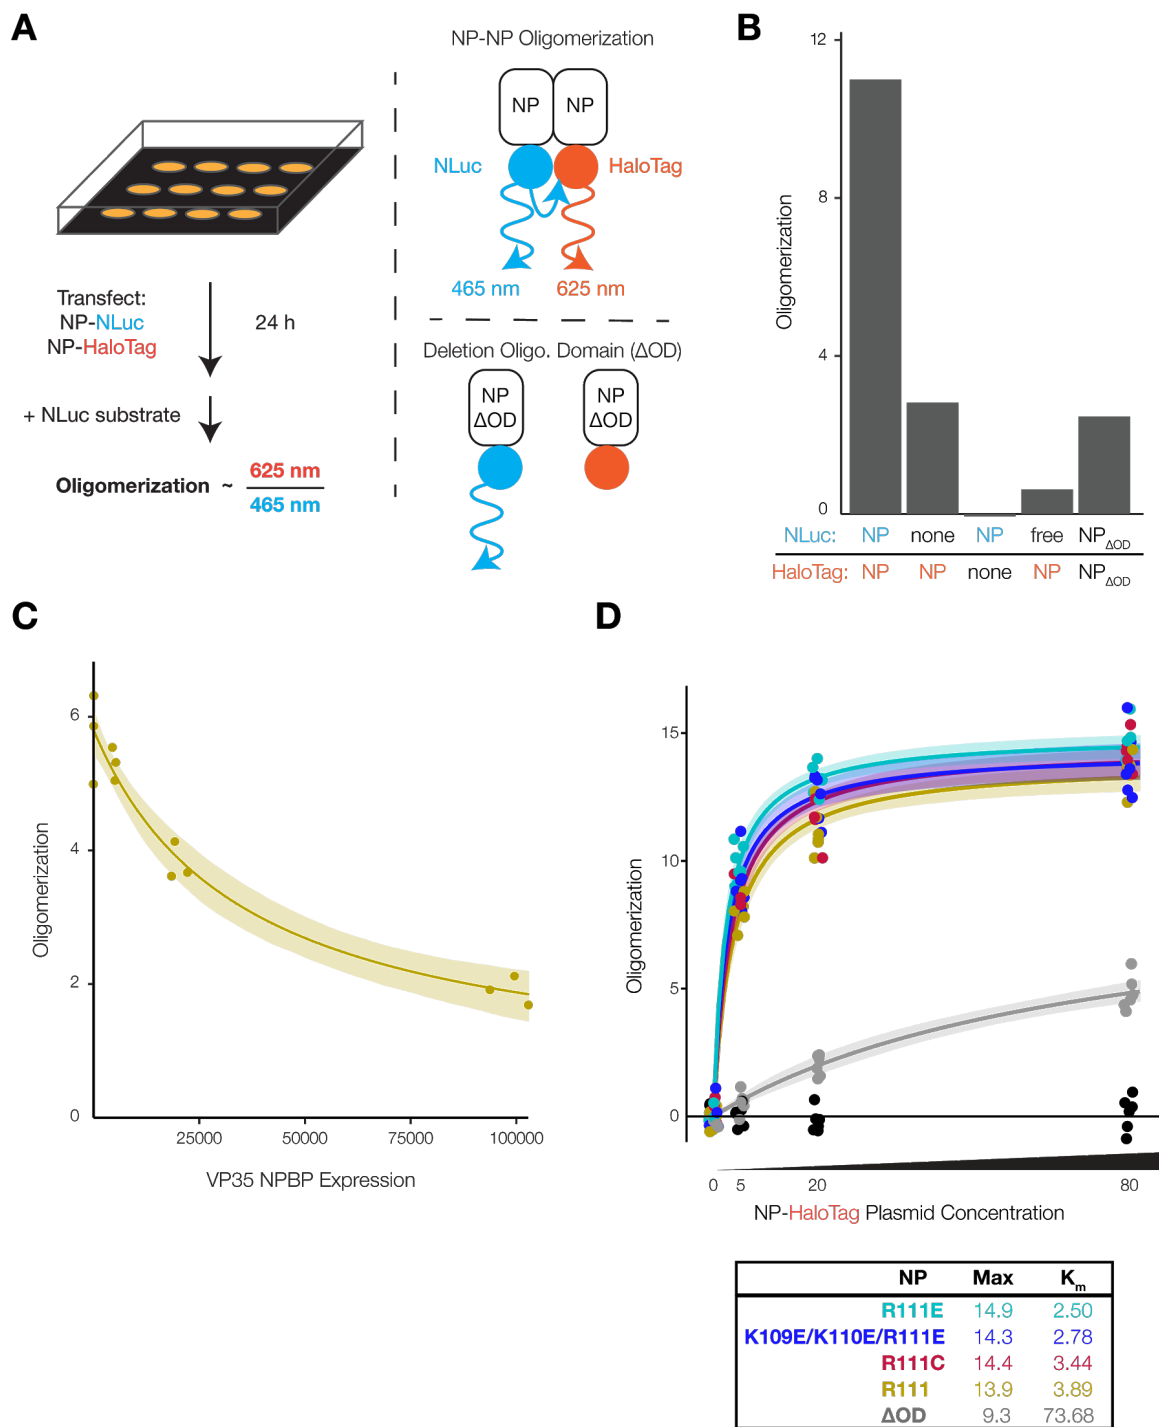

3  
4

1 **Figure 4**

2

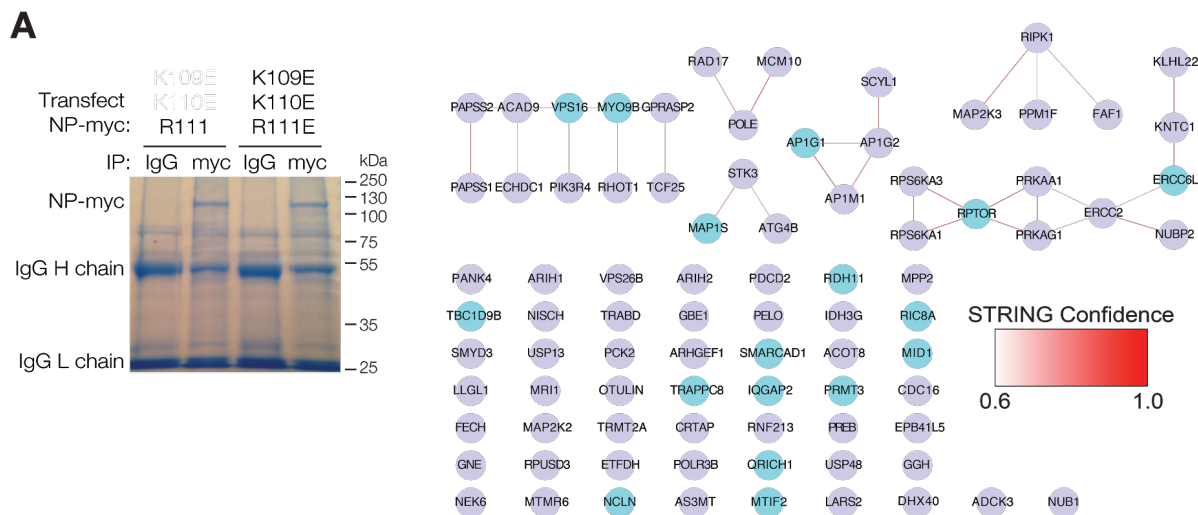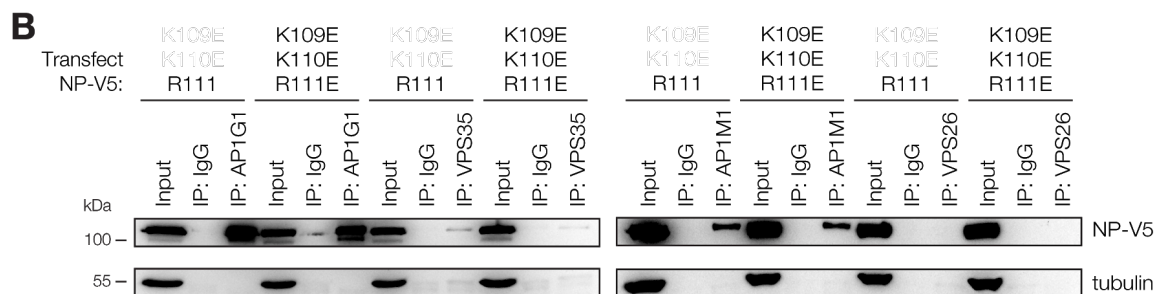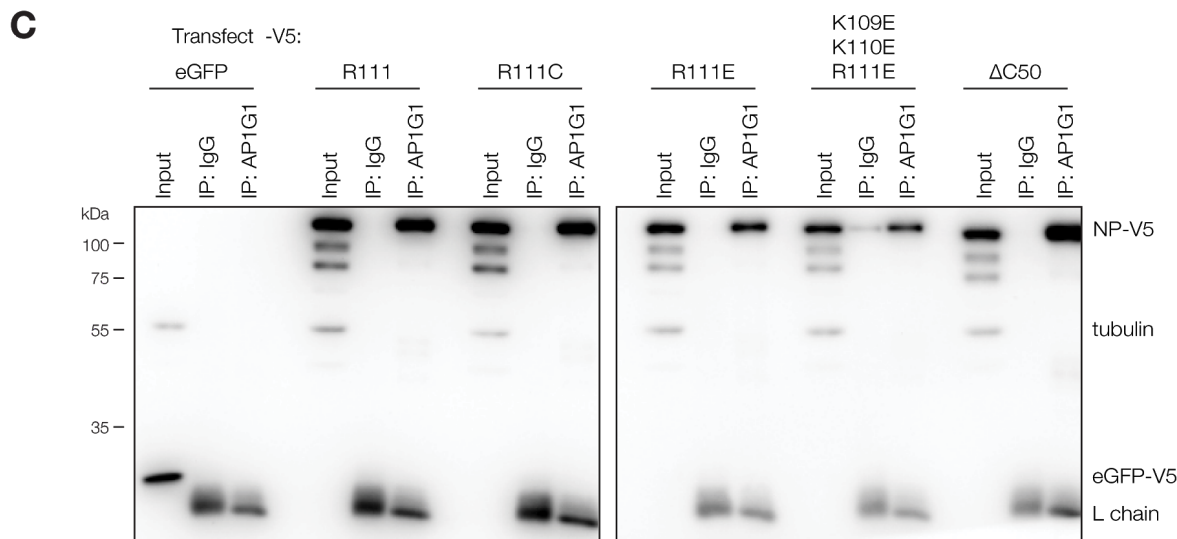

3

4

# 1 Figure 5

2

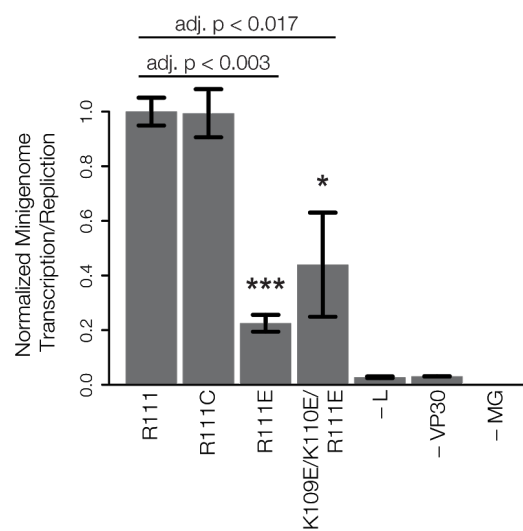

3  
4

1 **Figure S1**

2

**A**

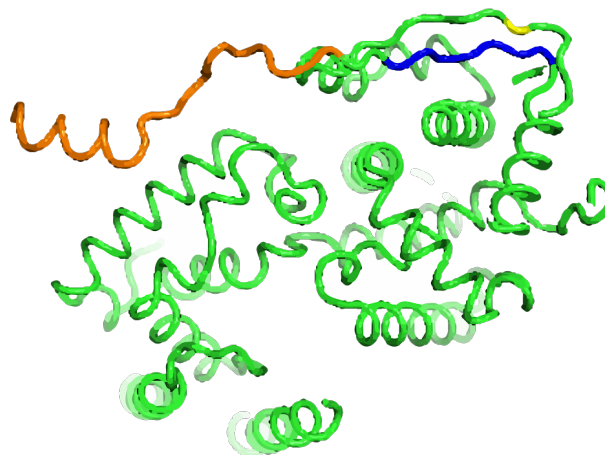

**B**

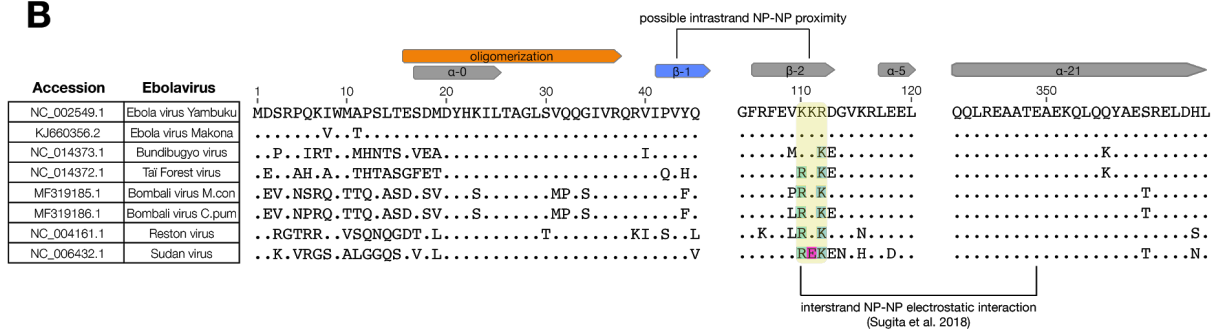

3

4

## 1 Figure S2

2

### A

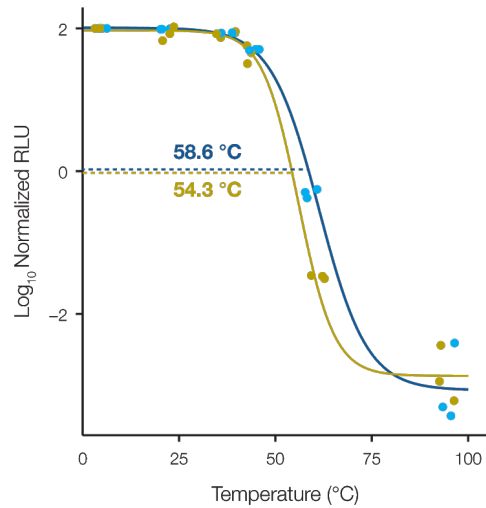

### B

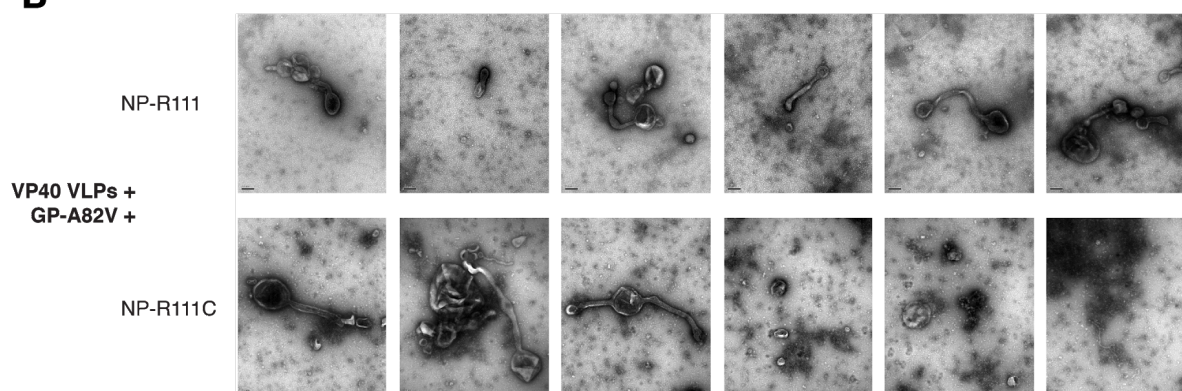

### C

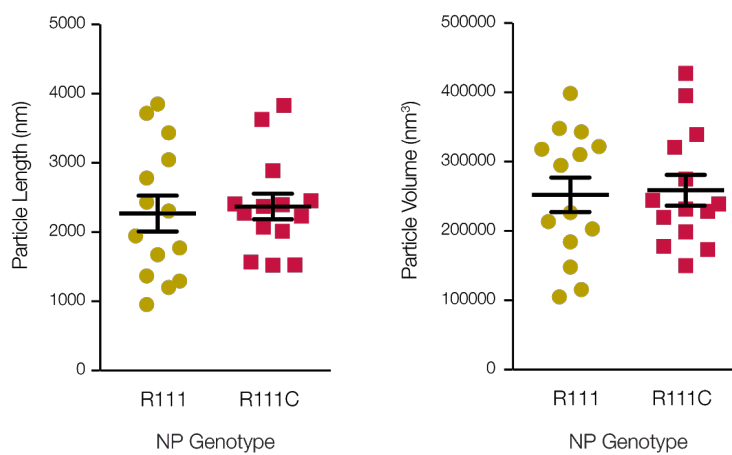

3

## 4 Figure S3



1

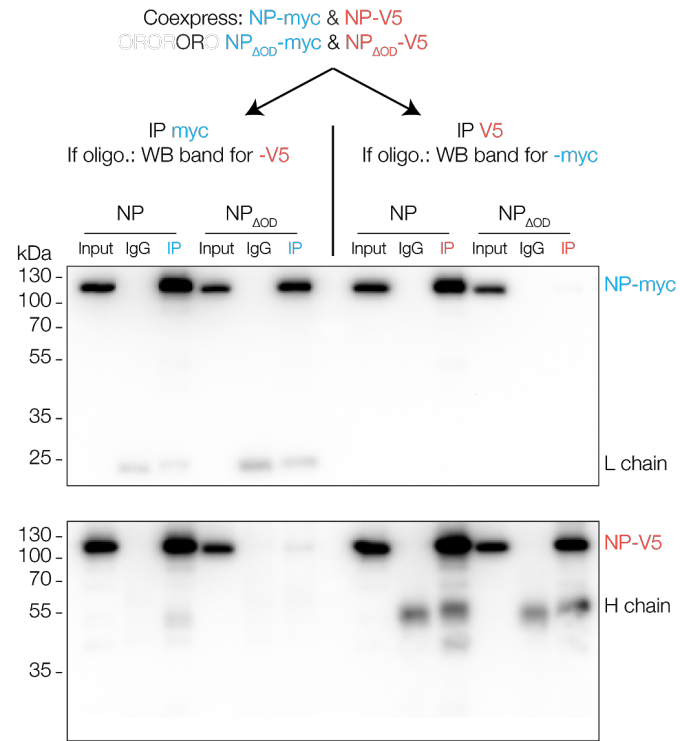

2

3
